1 **Complete loss of CASK causes severe ataxia through cerebellar**  
2 **degeneration in human and mouse**

3  
4 *Paras A Patel<sup>1,2</sup>, Julia Hegert<sup>5</sup>, Ingrid Cristian<sup>5</sup>, Alicia Kerr<sup>2,3</sup>, Leslie EW LaConte<sup>2,6</sup>, Michael A*  
5 *Fox<sup>3,4</sup>, Sarika Srivastava<sup>2,6,7</sup> and Konark Mukherjee<sup>2,8\*</sup>*

6 <sup>1</sup>Translational Biology, Medicine, and Health Graduate Program, Fralin Biomedical Research  
7 Institute, Roanoke, VA 24016, USA

8 <sup>2</sup>Center for Neurobiology Research, Fralin Biomedical Research Institute, Roanoke, VA 24016,  
9 USA

10  
11 <sup>3</sup>Virginia Tech, Department of Biological Sciences, Blacksburg, VA 24060, USA

12 <sup>4</sup>Virginia Tech, School of Neuroscience, Blacksburg, VA, 24060, USA

13  
14 <sup>5</sup>Orlando Health, APH, MP 331, USA

15  
16 <sup>6</sup>Virginia Tech Carilion School of Medicine, Department of Basic Science Education. Roanoke,  
17 VA 24016, USA.

18  
19 <sup>7</sup>Department of Internal Medicine, Virginia Tech Carilion School of Medicine. Roanoke, VA  
20 24016, USA.

21  
22 <sup>8</sup>Department of Psychiatry, Virginia Tech Carilion School of Medicine, Roanoke, VA 24016,  
23 USA.

24  
25 \* Corresponding Author, Konark Mukherjee,

26 FBRI, 2 Riverside Cir., Roanoke, VA 24014

27 Fax: 540-985-3373

28 Telephone: 540-526-2035

29 Email: [konark@vtc.vt.edu](mailto:konark@vtc.vt.edu),

30 One sentence summary of study: CASK loss causes cerebellar degeneration.

31 The authors have declared that no conflict of interest exists.

32 **Abstract**

33 Heterozygous loss of X-linked genes like CASK and MeCP2 (Rett syndrome) causes  
34 neurodevelopmental disorders (NDD) in girls, while in boys such loss leads to profound  
35 encephalopathy. The cellular basis for these disorders remains unknown. CASK is presumed to  
36 work through the Tbr1-reelin pathway in neuronal migration during brain development. Here we  
37 report our clinical and histopathological analysis of a deceased 2-month-old boy with a CASK-  
38 null mutation. We demonstrate that although smaller in size, the CASK-null human brain exhibits  
39 normal lamination without defective neuronal differentiation, migration, or axonal guidance,  
40 excluding the role of reelin in CASK-linked pathology. The disproportionately hypoplastic  
41 cerebellum in humans without CASK expression is associated with cerebellar astrogliosis, a  
42 marker for neuronal loss. Cerebellum-specific deletion in mouse confirms a post-developmental  
43 degeneration of cerebellar granular neurons that results in a small cerebellum. Mechanistically,  
44 cerebellar hypoplasia in CASK mutation thus results from neurodegeneration rather than  
45 developmental defects. Zygosity-pathology correlation suggests that NDDs like CASK mutation  
46 and Rett syndrome are pathologically neurodegenerative; however, random X-chromosome  
47 inactivation in the typical heterozygous mutant girls results in 50% of cells expressing the  
48 functional gene, resulting in a non-progressive pathology, whereas complete loss of the only allele  
49 in boys leads to unconstrained degeneration and encephalopathy.

50 Word count=200

51

52 **Introduction:**

53 Heterozygous mutations in certain X-linked genes (e.g., CDKL5, MeCP2 in Rett syndrome, and  
54 CASK in MICPCH (mental retardation and microcephaly with pontine and cerebellar hypoplasia  
55 (OMIM: 300749)) are linked to postnatal microcephaly in girls <sup>1</sup>. Hemizygous mutations in these  
56 same genes give rise to progressive epileptic encephalopathy and lethality in boys <sup>2-4</sup>. Rett  
57 syndrome was the first such disorder to be reported; it was described as a cerebral atrophic  
58 syndrome by Andreas Rett in 1966 <sup>5</sup>. Until the 1990s, Rett syndrome was considered a  
59 neurodegenerative disorder <sup>6</sup>. With the discovery, however, of the MeCP2 gene association,  
60 postmortem autopsy observations, and the development of preclinical models, focus shifted to  
61 dendritic morphology and synapse development and dysfunction, resulting in the re-classification  
62 of Rett syndrome as a neurodevelopmental disorder <sup>7 8</sup>. Studies on the cellular pathology associated  
63 with MeCP2 loss in boys with epileptic encephalopathies have, however, been limited <sup>9</sup>.

64 MICPCH is also considered to be a neurodevelopmental disorder that occurs due to  
65 heterozygous mutations in the X-linked gene CASK (calcium/calmodulin-dependent serine  
66 protein kinase) in girls. Despite the microcephaly associated with CASK mutation being described  
67 as postnatal and progressive, females with MICPCH grow into adulthood, often with an intellectual  
68 disability that is non-progressive <sup>10-14</sup>. Such mutations in hemizygous males are, however, lethal.  
69 These boys exhibit epileptic encephalopathy with pronounced cerebellar hypoplasia and  
70 progressive supratentorial atrophy <sup>4,15,16</sup>. Regression of motor skills has also been noted in a girl  
71 with MICPCH in adolescence <sup>17</sup>. The cellular pathology of CASK-linked disorders remains  
72 uncertain. This problem is exacerbated by the fact that CASK-null mice die within hours of birth  
73 and do not exhibit a difference in brain size or morphology from their wild type littermates at birth  
74 <sup>18</sup>. Based on the standard Theiler developmental staging of mice <sup>19</sup>, the immediate postnatal period

75 of mice best parallels the third trimester of human embryonic development (Carnegie staging; <sup>20</sup>),  
76 making any interpretation of postnatal brain pathology difficult.

77 Although often considered to be a component of presynaptic terminals, CASK in fact is  
78 ubiquitously expressed in the body and has been implicated in a variety of functions <sup>21,22</sup>. Outside  
79 of the brain, CASK has been shown to participate in cell proliferation <sup>23</sup>, cell polarization <sup>24</sup>, gap  
80 junctions and wound healing <sup>25</sup>, insulin secretion and signaling <sup>26,27</sup>, hypoxia response <sup>28,29</sup>, renal  
81 development and disease <sup>30,31</sup>, spermatogenesis and sperm motility <sup>32,33</sup>, and cardiac conductivity  
82 <sup>34,35</sup>, to name a few examples. In the brain, CASK has been examined as both a pre- and post-  
83 synaptic molecule <sup>36,37</sup>. It has also been suggested that CASK is involved in protein trafficking via  
84 its interaction with SAP97 <sup>38,39</sup>. CASK is proposed to be involved in axonal branching <sup>40</sup>, dendritic  
85 arborization <sup>41</sup>, dendrite spinogenesis <sup>42</sup> and synaptogenesis <sup>43</sup>. Thus, many hypotheses as to why  
86 loss of CASK leads to defects in brain development can be proposed.

87 CASK also has a function in regulating gene transcription <sup>44-46</sup>. It has been suggested that  
88 CASK translocates to the nucleus, where it regulates the function of T-box transcription factor  
89 (Tbr-1) <sup>46,47</sup>. It is proposed that CASK forms a ternary complex together with CINAP (CASK-  
90 interacting nucleosome assembly protein) and Tbr-1 to induce expression of molecules such as  
91 reelin that play a crucial role in brain development <sup>45</sup>. Reelin is a secreted extracellular molecule  
92 critical for neuronal migration<sup>48</sup>. Indeed, both in the reeler mice and Tbr-1 knockout mice, defects  
93 in proper lamination of cortex are seen <sup>49,50</sup>. In addition to the cortex, reeler mice also display a  
94 hypoplastic disorganized cerebellum with defects in neuronal migration and suppressed  
95 neurogenesis <sup>49</sup>. The neurodevelopmental function of CASK has been specifically attributed to the  
96 CASK's interaction with Tbr-1 and presumed regulation of reelin expression <sup>13,51,52</sup>.

97           Here, we report a detailed clinical description and autopsy findings from a 2-month-old  
98 boy harboring the *CASK* null mutation R27\*. Although the brain is small, the clear presence of  
99 tertiary gyri that form near term, as well as proper cortical and cerebellar lamination, argue against  
100 defects in neuronal migration; instead we uncover evidence of neurodegeneration suggested by  
101 reactive astrogliosis in the cerebellum. We then design and execute a genetic experiment in mice  
102 that provides conclusive evidence that loss of *CASK* indeed produces neurodegeneration in the  
103 cerebellum. Most pontocerebellar hypoplasias (PCH) are progressive, but based on the postnatal  
104 brain growth pattern, it has been hypothesized that MICPCH has a distinct pathogenic mechanism  
105 <sup>53</sup>. We instead provide evidence that mechanistically, MICPCH in girls with heterozygous *CASK*  
106 mutations is also degenerative, and the non-progressive course of MICPCH is dictated by  
107 uniqueness of the X-linked inheritance pattern in which 50% of brain cells express the normal  
108 gene.

## 109 **Results**

### 110 Complete *CASK* loss in humans causes profound neurodevastation and cerebellar atrophy

111 MICPCH subjects with heterozygous *CASK* mutations are known to live past their 30s. *Cask*<sup>+/-</sup>  
112 female mice are fertile beyond 6 months. We have allowed four *Cask*<sup>+/-</sup> mice to age more than two  
113 years, considered to be old for mice. All four mice survived to that age without adverse events.  
114 We did not observe any obvious phenotypes in these aged mice compared to wild-type littermates.  
115 The cerebellum displayed the typical layers and configuration without severe deterioration,  
116 indicating that the disorder is non-progressive (Supplemental Figure 1).

117           Null mutation of *CASK* in mice is, however, lethal and in boys, produces progressive  
118 encephalopathy. Due to the early lethality of *Cask* null mice, the postnatal pathology of complete  
119 *Cask* loss has been difficult to study to date. Here we describe detailed clinical findings and

120 autopsy results from a 2-month-old boy with a *CASK* null mutation who expired due to  
121 hypoventilation and neurogenic respiratory failure. A copy number variation study was  
122 unremarkable, but next generation sequencing of genes revealed a c.79C>T (p.Arginine27Ter)  
123 *CASK* mutation in exon 2 (Figure 1A). This *CASK* mutation introduces a stop codon in the very  
124 N-terminus of the *CASK* protein, precluding expression of any splice variant of *CASK*  
125 (Supplemental Figure 3). Magnetic resonance imaging (MRI) indicated normal lateral and third  
126 ventricles with an elongated fourth ventricle. The cerebellum appeared markedly hypoplastic  
127 without a vermis. The small posterior fossa was filled with fluid (Figure 1B). The corpus callosum  
128 was thin but present without any midline shift, and myelination was delayed for age. The cavum  
129 septum pellucidum seemed to be more prominent. No heterotopic cells were noted in any area, but  
130 there was some degree of smoothing, particularly of the frontal cortex. The brain stem appeared  
131 to be extremely thin.

132 Video electroencephalographic (vEEG) monitoring was done both during awake and  
133 sleeping states. Awake-state background EEG displayed a burst-suppression pattern with variable  
134 amounts of bursts and suppressions (Figure 1C and Supplemental Figure 2). This EEG pattern is  
135 typical of Ohtahara syndrome, a devastating epileptic encephalopathy, that usually co-occurs with  
136 *CASK*-null mutations<sup>4,15,16</sup>. The burst phase was dominated by a mixture of theta and delta waves.  
137 Overall, the EEG retained its symmetry in both hemispheres but was discontinuous. No  
138 electroclinical seizures were observed during the period of recording, although intermittent and  
139 independent sharp waves were observed, predominantly in the right temporal and occipital region.  
140 The sleep EEG was similar to the waking EEG and included burst-suppression signals. A spectral  
141 analysis of the entire epoch revealed skewing towards lower frequency with delta and alpha power  
142 dominating the spectra (Figure 1D-G).

143 At autopsy, head circumference was 32.7 cm, with a 37.0 cm crown-rump length and  
144 crown-heel length of 51.0 cm. The decedent was small for his age, and the brain weight was 300.8  
145 grams, which is 60% of what is expected at this age (Figure 2A). Except for lung, heart, and spleen,  
146 most other organs were smaller than expected but had an overall normal gross appearance (Figure  
147 2A, Supplemental Figure 5). The brain was well formed with normal gyri formations in the  
148 cerebral hemispheres. Tertiary gyri were present, and there was no evidence of polymicrogyria or  
149 other abnormal configuration. The Sylvian fissure was well formed, and the leptomeninges were  
150 clear (Figure 2B). Vascularization, including the circle of Willis, was normally formed. The  
151 central part of the cerebral hemispheres was edematous, and the septum cavum pellucidum was  
152 present (0.9 cm in vertical length). The basal ganglia displayed a normal architecture bilaterally.  
153 The left hippocampus was also architecturally normal with a serpiginous appearance. The right  
154 hippocampus had a blurred appearance (Supplemental Figure 4). The thalamus was normally  
155 formed and firm. The lateral ventricles were not dilated; the midbrain was very small with a patent  
156 but pinpoint cerebral aqueduct, and the fourth ventricle was slit-like. The cerebellum and the pons  
157 were markedly hypoplastic (Figure 2C, Supplemental Figure 4). The cerebellum, despite  
158 hypoplasia, had a normal configuration but did not exhibit the usual folia. There was no evidence  
159 for heterotopia of cells. The anterior vermis was not identifiable and appeared to be membrane-  
160 like; cerebellar hemispheres were thin, flattened and firm. The spinal cord was of uniform caliber  
161 and had no obvious pathology.

162 Absence of CASK does not affect neuronal migration, axonal guidance, or lamination in humans  
163 but may promote neuronal loss

164 Histologically, the cerebellum itself displayed proper cellular organization, with a defined  
165 external granular layer (EGL), molecular layer, and internal granular layer (IGL). There was a



166 uniform single layer of Purkinje cells between the molecular layer and the internal granular layer  
167 (Figure 2D, E). A proper migratory pattern of granule cells was visible and appropriate for age.  
168 The white matter was poorly organized, and the dentate nucleus was absent. The midbrain  
169 consisted of astrocytic cells with pink cytoplasm and some neuronal cells, however no organized  
170 substantia nigra was noted (Figure 2F). Sections of the cortex indicated orderly and proper  
171 neuronal migration; the germinal matrix was appropriately thinned for this age. The white matter  
172 tracts were discreet and adequate for this age (Supplemental Figure 4). The basal ganglia displayed  
173 normal numbers of neurons. The hippocampi were properly organized with uniform neuronal  
174 populations in all CA (cornu ammonis) zones. The midbrain and pons displayed corticospinal  
175 tracts. The cerebral aqueduct was patent and dilated. Within the pons, the pontine decussation was  
176 seen and the locus coeruleus properly formed. The medullary olives were poorly formed, and the  
177 fourth ventricle was widely patent. The spinal cord was unremarkable with adequate anterior horn  
178 cells and uniform radiating column. The central canal was patent throughout (Supplemental Figure  
179 4).

180 Histologically, almost all organs including the bone marrow, heart, and intestines were  
181 unremarkable. The endocrine glands also appeared normal, except for the adrenal cortex, which  
182 was thinned out. The kidneys had appropriate and orderly glomerular and tubular development  
183 (Supplemental Figure 5C, D). The heart rate varied between 90 and 150 beats per minute and  
184 displayed a sinus rhythm (Supplemental Figure 6).

185 Data clearly indicate that although CASK loss affects the size of the brain globally, the  
186 cerebellum and brainstem are disproportionately affected. Both in murine models and the human  
187 subject, early lethality is likely linked with the dysfunction of the brainstem leading to respiratory

188 failure. *Cask* null mice display hypoventilation and die within hours of birth although the brain is  
189 of normal size and properly laminated at death<sup>18</sup>.

190         The normal lamination and configuration of the brain in both CASK null humans and mice  
191 suggests that the histological pathology related to CASK loss is likely to be neurodegenerative,  
192 with neuronal loss. One of the most common hallmarks of neuronal damage and neuronal loss is  
193 reactive gliosis. We therefore next evaluated the cerebellum of the decedent for the ability to form  
194 synapses and for evidence of astrogliosis (Figure 3). Previous studies in the murine model have  
195 shown that CASK loss-of-function does not negatively impact synapse formation<sup>18,54</sup>, and in the  
196 human cerebellum evaluated here, immunostaining revealed that levels of the synaptic marker  
197 synaptophysin in the decedent's cerebellum were similar to levels observed in an age-matched  
198 control cerebellum (Figure 3A, B). GFAP staining of the cerebellum to detect astrogliosis,  
199 however, indicates that, compared to the control, the decedent exhibits ~5-fold higher amounts of  
200 GFAP immunoreactivity, specifically in the IGL (Figure 3A, C, D). In fact, large reactive  
201 astrocytes in the IGL were readily observed (Figure 3C). Together these data suggest that loss of  
202 CASK produces delayed neurodegenerative changes, causing the CASK-linked phenotype to  
203 typically manifest postnatally. We finally investigated myelination within the cerebellar cortex  
204 using FluoroMyelin lipid staining (Figure 3E) and observed that the myelination pattern exhibited  
205 disturbed arrangement within the IGL of the R27Ter subject, with discrete myelinated tracts, in  
206 contrast to the diffuse mesh-like myelin staining observed in the control subject. The histological  
207 features thus indicate that the disorganized white matter described earlier may be secondary to  
208 ongoing cerebellar grey matter degeneration. Thus our observations support the notion that loss of  
209 CASK induces cerebellar cortical degeneration, specifically in the IGL. To test this idea, we next

210 employed murine genetic experiments, where CASK is deleted in a temporally and spatially  
211 specified manner using Cre-LoxP-mediated gene excision.

212 Calb2-Cre targets post-migratory granule cells and a subset of Purkinje cells in the cerebellum

213 Previous neuroimaging data and the comprehensive CASK null brain histological autopsy  
214 results presented here clearly indicate that within the brain, loss of CASK is likely to  
215 disproportionately affect the hindbrain including the brainstem and cerebellum. In particular,  
216 CASK-linked lethality most likely results from effects on the brain stem. Our focus, therefore, in  
217 the study presented here is to evaluate the long-term effect of CASK loss in the cerebellum. We  
218 have previously demonstrated that CASK loss likely does not affect cerebellar development. We  
219 reached this conclusion by examining three different mouse constructs: 1) pan-neuronal *Cask*  
220 knockout mice, which die before P24 (postnatal day 24) but exhibit normal cerebellar formation  
221 and lamination<sup>54</sup>; 2) Purkinje cell-specific knockout mice, which display normal development and  
222 motor function<sup>54</sup>; and finally, 3) mice with *Cask* deletion in a distributed subpopulation of granule  
223 cells, which do not exhibit altered cell migration or survival<sup>54</sup>. There are two critical reasons that  
224 conclusions about cerebellar development from these previous experiments must be tempered: 1)  
225 for each of these mouse types, *Cask* was deleted only in small subset of cells in the cerebellum<sup>55-</sup>  
226 <sup>57</sup>; and 2) we did not study the long-term effect of *Cask* deletion in the cerebellum. To address  
227 these gaps and examine the role of CASK in the cerebellum over longer time periods, we have  
228 devised a method to delete CASK from most cerebellar cells in a manner that does not produce  
229 lethality in mice. To do so, we chose a mouse line in which Cre-recombinase is driven by an  
230 endogenous promoter of the signaling molecule *Calb2* (calretinin/calbindin2), reported earlier<sup>58</sup>.  
231 The choice of *Calb2*-Cre was made instead of a promoter such as *Math1*, a transcription factor,  
232 because *Math1* turns on earlier and is also expressed in the brain stem, which could contribute to

233 lethality. It has been shown that *Calb2* expresses in nearly all granule cells in the cerebellum<sup>59,60</sup>,  
234 but the exact timing of initiation of *Calb2*-Cre gene recombination in granule cells was not known.  
235 There have also been conflicting reports about the expression of *Calb2* in the Purkinje cells within  
236 the cerebellum<sup>59,60</sup>. We therefore first tested the recombination specificity of *Calb2*-Cre in mice  
237 at ages when the cerebellum is still developing and displays both the EGL and IGL (P8 and P15).  
238 We crossed *Calb2*-Cre mice with Cre-recombination indicator mice (LSL-tdTomato) (Figure 4A).  
239 The distribution of the tdTomato-expressing neurons serves as a proxy for CASK deletion when  
240 *Calb2*-Cre mice are crossed with *Cask*<sup>flxed</sup> mice in parallel (Figure 4B). Our data indicate that  
241 *Calb2*-Cre is active in the cerebellum as early as P8. By P8, recombination was observed in granule  
242 cells but only after migration into the IGL; recombination was also observed in many Purkinje  
243 cells (Figure 4C). By P15, *Calb2*-Cre already exhibited robust recombination in many parts of the  
244 brain and in the entirety of post-migratory granule cells. Dense cellular distribution with  
245 recombination was seen in the cerebellum, hippocampus, striatum and olfactory bulb. Sparsely  
246 distributed cells were observed throughout the brain, including the cortex (Figure 4D, E). The  
247 brainstem displayed minimal recombination, with sparsely tdTomato-labeled cells. Within the  
248 cerebellum, all granular cells in the IGL and a subset of Purkinje cells were positive for  
249 recombination at P15. Cells in the EGL, however, did not display any recombination, indicating  
250 that *Calb2*-Cre-driven recombination occurs only after migration of granule cells (Figure 4E). Our  
251 data thus indicate that *Calb2*-Cre specifically leads to deletion of CASK both in a subset of  
252 Purkinje cells and in granule cells within the IGL by P15 and is not likely to affect the brainstem  
253 or its function.

254 Deletion of CASK from cerebellar neurons results in later-onset progressive degeneration of the  
255 cerebellum and severe ataxia

256 We next examined mice from crosses of the *Calb2*-Cre and *Cask*<sup>floxed</sup> lines. It has been  
257 shown previously that the *Cask*<sup>floxed</sup> mouse is a hypomorph that expresses ~40% CASK, likely due  
258 to a phenomenon known as selection cassette interference<sup>18</sup>. *Cask*<sup>floxed</sup> mice are smaller than wild  
259 type mice and exhibit cerebellar hypoplasia<sup>13,18,54</sup>. *Cask*<sup>floxed</sup>; *Calb2*-Cre F1 mice were genotyped  
260 by PCR.

261 *Cask*<sup>floxed</sup>; *Calb2*-Cre mice remain indistinguishable from the *Cask*<sup>floxed</sup> mice well into  
262 adulthood (~40 days), indicating that acute deletion of *Cask* does not have significant effects on  
263 cerebellar development, motor learning, or locomotor function. Past two months of age, however,  
264 *Cask*<sup>floxed</sup>; *Calb2*-Cre mice begin displaying obvious locomotor incoordination and ataxia which  
265 are rapidly progressive. By approximately P100, these mice are profoundly ataxic, are unable to  
266 keep their balance and repeatedly fall over with an inability to walk forward (supplemental video).  
267 Despite profound motor coordination deficits, the *Cask*<sup>floxed</sup>; *Calb2*-Cre mice are otherwise healthy  
268 and display a slick coat, good body condition score, and are bright, alert and responsive. Compared  
269 to littermate *Cask*<sup>floxed</sup> controls, the cerebellum of the *Cask*<sup>floxed</sup>; *Calb2*-Cre mouse is extremely  
270 diminished in volume at P100 when the motor phenotype has plateaued (Figure 5A, B). Comparing  
271 the histology of the *Cask*<sup>floxed</sup>; *Calb2*-Cre cerebellum at P30 (well before onset of ataxia) and P100  
272 (after onset of ataxia), our results indicate that at P30, the cerebellum of *Cask*<sup>floxed</sup>; *Calb2*-Cre mice  
273 is populated with well-placed granule and Purkinje cells. At P100, however, we observe profound  
274 loss of granule cells, whereas Purkinje cells remain visible as a standard single layer of cells  
275 (Figure 5C). The molecular layer of the cerebellum is thin and collapsed, most likely due to loss  
276 of parallel fibers arising from the granular cells and loss of synaptic connections between granule  
277 cells and Purkinje cells (Figure 5D-G). We therefore next quantified synaptic connections within  
278 the cerebellar layers using bassoon as a pre-synaptic marker. As seen (Figure 5H-K), our data

279 indicate that synapse density is unaltered, although the absolute number of synapses is reduced  
280 due to the shrunken volume of the molecular layer. The large number of remaining synapses are  
281 likely to be derived from the climbing fibers. Notably, other regions with *Calb2*-Cre recombination  
282 such as the olfactory bulb, hippocampus and striatum do not show the striking hypoplasia  
283 observable in the cerebellum. In our previous studies, we did not observe degeneration of retinal  
284 ganglion cells, which are also positive for *Calb2*-Cre<sup>58</sup>. Our data here thus indicate that loss of  
285 CASK results in the disproportionate degeneration of a specific vulnerable neuronal population,  
286 cerebellar granule cells, leading to cerebellar hypoplasia.

287         A decrease in grey matter creates an impression of increased white matter area. On the  
288 other hand, the histopathology in the human cerebellum displayed disorganized white matter  
289 (Figure 3E). We therefore quantified myelin in the *Cask*<sup>floxed</sup>;*Calb2*-Cre mice using  
290 FluoroMyelin<sup>TM</sup> staining. As seen in Figure 6A, the myelin appears to be disorganized in the white  
291 matter of folia from the *Cask*<sup>floxed</sup>;*Calb2*-Cre mouse cerebellum, which is most obvious in the  
292 region immediately distal to Purkinje cells. We also observed extremely limited myelinated axons  
293 in the anterior-most folium (Figure 6A). Quantification of pixels displayed a strong trend towards  
294 a decrease in myelinated fibers which did not reach statistical significance (Figure 6B). The  
295 degeneration of cerebellar grey matter thus is also associated with disorganization of the white  
296 matter in the *Cask*<sup>floxed</sup>;*Calb2*-Cre mouse cerebellum, and the broadened white matter layer is  
297 likely to be filled only with acellular matrix. Because the *Cask*<sup>floxed</sup>;*Calb2*-Cre mouse represents a  
298 targeted deletion of CASK in cerebellar neuronal cells, it is reasonable to conclude that the  
299 observed disordered white matter is a property of the underlying neuronal pathology rather than  
300 an oligodendrocyte-mediated pathology and confirms our observations from the human subject.

301           Neuronal loss or damage is typically associated with gliosis, as seen in the human subject,  
302 so we next immunostained mouse cerebella with a marker for reactive gliosis, glial acidic fibrillary  
303 protein (GFAP) (Figure 6C). Although *Cask*<sup>floxed</sup> mice display some GFAP positivity,  
304 *Cask*<sup>floxed</sup>; *Calb2*-Cre mice displayed an almost 2-fold higher level of astrogliosis compared to age-  
305 matched control *Cask*<sup>floxed</sup> mice (Figure 6D). Overall, this finding suggests that CASK loss-of-  
306 function produces protracted neuronal loss in the cerebellum, explaining why MICPCH typically  
307 becomes obvious a few months after birth. The cerebellar hypoplasia associated with loss of CASK  
308 represents disproportionate neuronal loss in the cerebellum.

309           Finally, we examined the functional loss associated with the cerebellar degeneration in  
310 *Cask*<sup>floxed</sup>; *Calb2*-Cre mice. By P100, the mouse's hindlimbs can no longer maintain normal  
311 righting, and the mice display hindlimb clasping with no obvious dystonic movement (Figure 7A).  
312 Accelerating rotarod balance experiments suggest that even at P48, the mutant mice have a trend  
313 to underperform on a rotarod, indicating that the process of cerebellar degeneration and consequent  
314 functional degradation may be ongoing even before obvious locomotor defects are visually noticed  
315 within the cage. At P70 the mice are unable to perform on the rotarod at all, demonstrating a rapid  
316 degradation of locomotor coordination within a short span of 3 weeks (Figure 7B). Additionally,  
317 the cerebellar degeneration and accompanying motor phenotype only manifest in the homozygous  
318 knockout of CASK from cerebellar cells and not in the heterozygous deletion (Figure 7C-E)  
319 indicating that despite CASK being absent from approximately half the cells in the heterozygous  
320 deletion due to its X-linked nature, cerebellar degeneration requires total deletion of CASK.  
321 Overall, our data indicate that deletion of CASK does not affect brain development and the brain  
322 phenotype is unlikely due to defects of reelin function. Further, CASK loss leads to degeneration

323 of cerebellar neurons leading to pronounced cerebellar atrophy that results in a progressive  
324 cerebellar ataxia.

## 325 **Discussion**

326 Developmental disorders are defined based on their clinical course rather than cellular pathology.  
327 Presentation of a severe, chronic disability (mental and/or physical impairment) in three or more  
328 areas of major life activity by the age of 22 that is likely to continue through the individual's  
329 lifetime is classified as a developmental disorder (*Developmental Disabilities Assistance and Bill  
330 of Rights Act of 2000*). Strategies for molecular therapeutic intervention, however, are more likely  
331 to be dependent on cellular pathology rather than the clinical course of a given disorder. Conditions  
332 associated with mutations in the human *CASK* gene have been described as developmental  
333 disorders<sup>10,12</sup>. *CASK* is a ubiquitously expressed gene and has been proposed to have a function in  
334 a variety of organs including the intestine, kidney, heart and brain<sup>21,22</sup>, and mutations in *CASK*  
335 produce microcephaly as well as somatic growth retardation<sup>10,12</sup>. In boys who do not express  
336 *CASK*, a clear picture has emerged consisting of neurodegeneration, microcephaly, pontocerebellar  
337 hypoplasia (PCH), and a consistently abnormal EEG pattern characterized by disorganization, low  
338 frequency, attenuation and discontinuity. *CASK* null boys are thus likely to be diagnosed with  
339 epileptic encephalopathies such as Ohtahara syndrome and West syndrome. Despite uniform  
340 neurological findings in these subjects, findings involving other organ systems remain inconsistent  
341 and often unremarkable. Our analysis of *CASK* null mutations in boys indicates that the function/s  
342 of *CASK* that are critical for survival are brain-specific; all other organ systems can function within  
343 the normal range without *CASK*<sup>16</sup>. In fact, we have previously demonstrated that deletion of *CASK*  
344 in neurons is sufficient to produce somatic and brain size reduction in mice<sup>54</sup>. The thinning and  
345 dysfunction of the brain stem manifests as aberrant respiratory, deglutition and cardiovascular



346 reflexes, and it is this dysfunction that underlies the lethality associated with CASK loss in  
347 mammals<sup>16,18</sup>.

348         Neurodevelopment could be stalled at several steps of brain development. This includes  
349 cell proliferation, neuronal differentiation and polarization, neuronal migration and final neuronal  
350 maturation including axonal and dendritic growth and synaptogenesis. At a molecular level CASK  
351 has been proposed to play a role in all of these processes. Evidence exists that suggests CASK  
352 participates in mitotic spindle orientation and cell proliferation<sup>61</sup>, in cell polarization<sup>24</sup>, in axonal  
353 and dendritic maturation and synaptogenesis<sup>40,41,43</sup>. Within the synapse CASK can be found in  
354 molecular complexes that include other important molecules like Mint1, Caskin, liprin- $\alpha$  and the  
355 adhesion molecule neurexin<sup>21,36,62,63</sup>. CASK is a kinase that phosphorylates neurexin and is likely  
356 to regulate this complex formation<sup>62,64-66</sup>. The most accepted notion of CASK in  
357 neurodevelopment has, however, been the role of CASK in neuronal migration via its interaction  
358 with CINAP and Tbr-1 resulting in the upregulation of reelin transcription<sup>13,45,46,67</sup>. Our analysis  
359 of the CASK-null human brain is, however, unable to support any of these putative roles of CASK  
360 in neurodevelopment.

361         Genetic manipulation of *Cask* in murine models has demonstrated that CASK-linked  
362 murine brain pathology is postnatal and not likely to be a developmental defect<sup>54,58</sup>. Although the  
363 delivery of the decedent described here was late preterm, Apgar scores were normal, and the infant  
364 was released from the hospital without concern. Rapid regression within days to weeks has been  
365 noted in this and other boys with *CASK*-null mutations, indicating that although degeneration may  
366 begin in the third trimester, it continues rapidly throughout infancy. Despite a smaller size, the  
367 gross and histological findings in a brain without CASK are minimal. Overall, the brain  
368 configuration, vasculature, ventricular system, meninges, brain lamination and neuronal migration

369 all remained unaltered. This indicates that in the presence of *CASK* mutation, embryonic brain  
370 development appears unchanged, with no defect in neuronal differentiation and migration. The  
371 findings from neuroimaging and histological studies of human cases are consistent with the  
372 findings of *CASK* knockout mice where the brain size, lamination and synapse formation are all  
373 normal at birth<sup>18</sup>. In fact, absence of an acute locomotor effect in *Cask*<sup>flxed</sup>; *Calb2*-Cre mice  
374 excludes a synaptic role of *CASK* in cerebellar function. Overall our study here indicates that  
375 *CASK* is not likely to work in neurodevelopment via the purported *Tbr-1*-reelin pathway. This  
376 interpretation is in line with the observation that in the mouse model, abrogation of the *CASK*-  
377 *Tbr-1* interaction does not affect brain size or lamination<sup>68</sup>. A number of *CASK* missense  
378 mutations have been identified that are associated with intellectual disability and MICPCH. Recent  
379 studies on these missense mutations have also indicated that the *CASK*-*Tbr-1* interaction is an  
380 unlikely mechanism of MICPCH<sup>11, 74</sup>.

381 In girls with heterozygous *CASK* mutations, the predominant manifestations are also brain-  
382 related<sup>10,12</sup>. Our data presented here demonstrate that although *Cask*<sup>+/-</sup> mice have cerebellar  
383 hypoplasia, they do not significantly degenerate further into old age, which agrees with the clinical  
384 definition of a neurodevelopmental disease. In girls with MICPCH and in *Cask*<sup>+/-</sup> mice, however,  
385 ~50% of cells still express *CASK*<sup>54,67</sup>, confounding the study of neuropathology and making it  
386 difficult to draw firm conclusions. Conditional genetic animal model experimentation allows us to  
387 overcome the difficulties presented by this X-linked condition and also helps separate the  
388 neurodegenerative pathology of *CASK* loss from the developmental phase.

389 *CASK* deletion in mice is lethal, but by generating otherwise healthy mice that do not  
390 express *Cask* in many parts of the brain including the cerebellum, we are able to clearly  
391 demonstrate that lack of *CASK* produces cerebellar atrophy and degeneration. *CASK* has

392 previously been identified as a biomarker for several neurodegenerative disorders<sup>69-72</sup>; our study  
393 thus explains these previous unbiased findings. *CASK* loss, however, does not uniformly produce  
394 neurodegeneration; for example, loss of *CASK* is also associated with optic nerve hypoplasia, but  
395 unexpectedly, *CASK* deletion from retinal ganglion cells (whose axons form the optic nerve) does  
396 not negatively affect optic nerve pathology in mice of the same genotype<sup>58</sup>. Similarly, *Calb2* is  
397 present in many cortical interneurons and neurons of the olfactory bulb, hippocampus and striatum,  
398 but we do not observe death of these cells in the *Cask*<sup>floxed</sup>;*Calb2*-Cre mice. In fact, a closer look  
399 within the cerebellum suggests that the cerebellar degeneration may be primarily due to granule  
400 cell death, making this condition most similar to Norman-type cerebellar atrophy (OMIM:  
401 213200). Many Purkinje cells, which are among the first cerebellar cells to express *Calb2*-Cre, do  
402 not die off but rather persist throughout the lifespan, even following the appearance of ataxia. Thus  
403 *CASK* loss may affect neurons differentially.

404 PCH pathologies are typically thought to be neurodegenerative in their origin beginning  
405 antenatally<sup>53</sup>. Defects in both energy production and protein metabolism (specifically, protein  
406 synthesis) are known to disproportionately affect the cerebellum and are likely causes of PCH<sup>73</sup>.  
407 In the case of *CASK* mutation, PCH has been described as neurodevelopmental, mostly due to the  
408 non-progressive course seen in females<sup>74</sup>. In contrast to hemizygous and homozygous  
409 *Cask*<sup>floxed</sup>;*Calb2*-Cre mice, the heterozygous *Cask*<sup>floxed</sup>;*Calb2*-Cre mice fail to exhibit cerebellar  
410 degeneration (Figure 7C-E). Our findings here thus suggest that *CASK*-linked PCH is also  
411 neurodegenerative and the arrest of neurodegeneration in girls most likely arises from mosaicism  
412 of the defective X-linked gene, which guarantees that ~50% of brain cells retain a normally  
413 functioning *CASK* gene (Figure 8). Mechanistically, our findings demonstrating that *CASK* is also  
414 likely to function in pathways associated with energy production and protein metabolism<sup>54,75</sup>,

415 confirming that MICPCH shares not only the pathogenic mechanism, but also a common  
416 molecular pathway with other types of PCH.

417 Heterozygous mutations in X-linked genes other than *CASK*, such as *MeCP2* and *CDKL5*,  
418 are associated with postnatal microcephaly in girls <sup>1</sup>. Intriguingly, subjects with mutations in these  
419 genes show an initial normal developmental trajectory followed by developmental arrest and delay  
420 (regression) <sup>76,77</sup>. Mutational analysis of orthologous genes in murine models also produces  
421 phenotypes which are clearly post-developmental, presenting only in adulthood <sup>78</sup>. Incidentally,  
422 just like *CASK* mutations, *CDKL5* and *MeCP2* mutations in males are associated with epileptic  
423 encephalopathy <sup>2,3</sup>. These data raise the possibility that even in disorders such as Rett syndrome  
424 (*MeCP2* mutation) and *CDKL5* deficiency, the pathology may be neurodegenerative, as originally  
425 suggested by Andreas Rett <sup>5</sup>, but the clinical course may not be progressive in females due to the  
426 mosaic expression of the normal gene under heterozygous conditions.

## 427 **Materials and Methods:**

### 428 Statement of ethics

429 All studies described herein were approved by the Virginia Tech Institutional Animal Care and  
430 Use Committee and Institutional Review Board.

### 431 Statistics

432 A two-tailed Student's t-test was used as a comparison between two genotypes in each experiment  
433 to compute significance with an alpha of 0.05.

### 434 Clinical History

435 The decedent was a male born via vaginal delivery at 36.1 weeks of gestation to a 34-year-  
436 old woman, G3, P3, A1 (Gravida, para, abortus). He was conceived through in vitro fertilization

437 with a sperm donor. He was born as a monochorionic, diamniotic twin. Ultrasound at the third  
438 trimester indicated the presence of slight microcephaly and smaller cerebellum which raised some  
439 concerns. He was also small for gestational age with a weight of 2.4 kg (0% Percentile, Z score -  
440 7.37), length of 43 cm (4<sup>th</sup> Percentile, Z score -1.71) and head circumference of 30 cm (4<sup>th</sup>  
441 percentile, Z score-1.79). The Apgar scores at 1 and 5 minutes after birth were recorded as 8 and  
442 9. The decedent was discharged from the hospital 2 days after birth. At home he became apneic  
443 with hypoventilation and was readmitted to a hospital 4 days later. Despite positive airway pressure  
444 ventilation, the apneic spells continued which led to neurological and genetic investigations. He  
445 was then diagnosed with microcephaly and pontocerebellar hypoplasia with CASK mutation. He  
446 displayed poor feeding, profound hypotonia, microcephaly, micrognathia, bilateral clubfoot, and  
447 vertical chordee with penile torsion. Oral-pharyngeal motility studies revealed mild to moderate  
448 oral motor dysphagia; there were episodes of silent aspirations with very limited reflux. A  
449 gastrostomy tube placement was performed. Fluctuations in body temperature with hypothermia  
450 and heart rate were also noted. Within 3 weeks after his birth, torso flexions were noted occurring  
451 2-3 times a day. He also displayed tics in the hands, feet and neck which lasted for several seconds  
452 to several minutes. The decedent developed irritability and intolerance to feeds, hypothermia and  
453 acute respiratory failure with apnea. A surface, 25-channel video electroencephalography (vEEG)  
454 was performed using an international 10-20 system. A diagnosis of Ohtahara syndrome was  
455 established due to the presence of a typical burst suppression pattern. He was started on keppra  
456 and a ketogenic diet. Possibility of long-term palliative care including tracheostomy was discussed,  
457 but a decision was made against aggressive continued therapy. He passed away 2 months and 6  
458 days after birth.

459 EEG Spectral Analysis

460 Raw data were trimmed for artifacts by a trained observer in the clinic. Data were analyzed  
461 in MATLAB 2017a using the EEGLab toolbox. After filtering from 0.01-50Hz, bad channels were  
462 removed based on spectral power. Spectral power was plotted for each channel independently  
463 using the spectopo() function with a window length of 256 samples, FFT length of 256, and 0  
464 overlap in the entire 0.01-50Hz frequency band. Channels covering each of a given lobe (frontal,  
465 parietal, temporal, occipital, central) were then grouped and mean power spectral density was  
466 calculated within each biologically relevant frequency band: delta, alpha, beta, theta, and low  
467 gamma. Time-frequency plots were generated for a representative 1 minute of the recording using  
468 a divisive baseline.

#### 469 Generation of Mouse Lines

470 *Calb2*-Cre mice (strain 010774) was obtained from Jackson Laboratory, *Cask*<sup>floxed</sup> mice  
471 (strain 006382) was a kind gift from Prof. Thomas Südhof. *Cask*<sup>floxed</sup> females were bred with  
472 *Calb2*-Cre positive males to generate the F1 cross *Cask*<sup>floxed</sup>::*Calb2*-Cre. F1 mice were bred to  
473 Ai14-LSL-tdTomato-positive males obtained from Jackson Laboratory (strain 007914) to generate  
474 fluorescent reporter mice. F1 mice were genotyped by PCR using primers targeted at either LoxP  
475 elements, a sequence within the Cre gene, or a sequence within the tdTomato gene. All lines were  
476 from a C57BL/6J background backcrossed for at least 25 generations.

#### 477 Antibodies and Material Reagents

478 Bassoon monoclonal antibodies were obtained from Enzo Lifescience, GFAP monoclonal  
479 antibodies were obtained from Invitrogen, calbindin polyclonal antibody from Invitrogen,  
480 synaptophysin antibody from Sigma and secondary antibodies conjugated with AlexaFluor 488,  
481 550 and 633 were obtained from Thermofisher. Hardset Vectashield™ with DAPI was obtained  
482 from Vector Laboratories.

### 483 Immunostaining of Mouse Tissue

484 For all immunostaining, mice were sacrificed by trans-cardiac perfusion first with  
485 phosphate buffered saline (PBS) for exsanguination and subsequently with 4% paraformaldehyde  
486 for fixation of tissues. Brains were dissected and post-fixed for at least 24 hours in 4%  
487 paraformaldehyde. After post-fixation, brains were hemisected along the longitudinal fissure and  
488 50 $\mu$ m sagittal sections were cut using a ThermoScientific™ Microm HM650V Vibratome.  
489 Sections were submerged in permeabilization/blocking solution composed of 10% fetal bovine  
490 serum and 1% Triton-X 100 in PBS overnight at +4°C.

491 Rabbit anti-calbindin was diluted at 1:50 in blocking solution and mouse anti-bassoon was  
492 diluted at 1:200 in blocking solution. For GFAP immunostaining, mouse anti-GFAP was diluted  
493 at 1:200 in blocking solution. After blocking/permeabilization overnight, free-floating sections  
494 were incubated for 3 hours in dilute primary antibody at room temperature. After incubation in  
495 primary antibody, sections were washed 3 times for 5 minutes in PBS before being incubated in  
496 secondary antibody for the respective host species for 1 hour at room temperature. Sections were  
497 again washed and mounted on slides using VECTASHIELD® anti-fade medium. Quantification  
498 of synapse density was conducted using the SynQuant algorithm <sup>80</sup>.

### 499 Immunostaining of Human Tissue

500 Human tissue obtained during autopsy was post-fixed in 10% formalin overnight,  
501 embedded in paraffin, and subsequently sectioned into 20 $\mu$ m sections onto charged slides. Slides  
502 were deparaffinized with 3 changes of poly-xylenes for 10 minutes each time and rehydrated using  
503 an ethanol gradient from 100%-95%-70%-50%-H<sub>2</sub>O for 5 minutes in each condition. Antigen  
504 retrieval was conducted by boiling slides in 10mM sodium citrate buffer with 0.1% Tween-20 for  
505 10 minutes in a domestic microwave followed by running the slides under cold tap water for 10

506 minutes. Immunostaining for GFAP, calbindin and synaptophysin was then conducted using the  
507 same procedure described for mouse tissue.

### 508 Motor Behavioral Assays

509 Accelerating Rotarod experiments were conducted by placing 4 *Cask*<sup>(floxed)</sup>::*Calb2*-Cre  
510 mice at P100 (post-ataxia onset), at P48 (pre-ataxia onset), and age-matched *Cask*<sup>(floxed)</sup> control  
511 mice on an accelerating Rotarod, beginning at 2 cycles/minute and accelerating at a rate of 5  
512 cycles/minute until mice fell off the platform. Three trials were conducted in succession for each  
513 mouse, with 5 minutes of rest between trials.

514

515 Author contribution: Experiments were conceived by KM, PP, MF, IC. Data analyzed by, KM,  
516 MF, PP, JH, LL, SS. Experiments conducted by PP, AK, JH. Papers written by KM, PP, MF, LL,  
517 SS, IC, JH.

518 Acknowledgements:

519 The work was supported with funding from the NIH National Eye Institute (R01EY024712) to  
520 KM. We thank Drs. Thomas Südhof and Alexei Morozov for providing *CASK*<sup>(floxed)</sup> mice and Ai14-  
521 LSL-tdTomato mice, respectively.

### 522 **References**

- 523 1. Seltzer LE, Paciorkowski AR. Genetic disorders associated with postnatal microcephaly. *Am J Med Genet C*  
524 *Semin Med Genet.* 2014;166C(2):140-155.
- 525 2. Jakimiec M, Paprocka J, Smigiel R. CDKL5 Deficiency Disorder-A Complex Epileptic Encephalopathy. *Brain*  
526 *Sci.* 2020;10(2).
- 527 3. Kankirawatana P, Leonard H, Ellaway C, et al. Early progressive encephalopathy in boys and MECP2  
528 mutations. *Neurology.* 2006;67(1):164-166.
- 529 4. Saito H, Kato M, Osaka H, et al. CASK aberrations in male patients with Ohtahara syndrome and cerebellar  
530 hypoplasia. *Epilepsia.* 2012;53(8):1441-1449.
- 531 5. Rett A. [On a unusual brain atrophy syndrome in hyperammonemia in childhood]. *Wien Med Wochenschr.*  
532 1966;116(37):723-726.



- 533 6. FitzGerald PM, Jankovic J, Glaze DG, Schultz R, Percy AK. Extrapyramidal involvement in Rett's syndrome.  
534 *Neurology*. 1990;40(2):293-295.
- 535 7. Neul JL, Zoghbi HY. Rett syndrome: a prototypical neurodevelopmental disorder. *Neuroscientist*.  
536 2004;10(2):118-128.
- 537 8. Zoghbi HY. Postnatal neurodevelopmental disorders: meeting at the synapse? *Science*.  
538 2003;302(5646):826-830.
- 539 9. Schule B, Armstrong DD, Vogel H, Oviedo A, Francke U. Severe congenital encephalopathy caused by MECP2  
540 null mutations in males: central hypoxia and reduced neuronal dendritic structure. *Clin Genet*.  
541 2008;74(2):116-126.
- 542 10. Burglen L, Chantot-Bastarud S, Garel C, et al. Spectrum of pontocerebellar hypoplasia in 13 girls and boys  
543 with CASK mutations: confirmation of a recognizable phenotype and first description of a male mosaic  
544 patient. *Orphanet J Rare Dis*. 2012;7:18.
- 545 11. LaConte LEW, Chavan V, Elias AF, et al. Two microcephaly-associated novel missense mutations in CASK  
546 specifically disrupt the CASK-neurexin interaction. *Hum Genet*. 2018;137(3):231-246.
- 547 12. Moog U, Kutsche K, Kortum F, et al. Phenotypic spectrum associated with CASK loss-of-function mutations.  
548 *J Med Genet*. 2011;48(11):741-751.
- 549 13. Najm J, Horn D, Wimplinger I, et al. Mutations of CASK cause an X-linked brain malformation phenotype  
550 with microcephaly and hypoplasia of the brainstem and cerebellum. *Nat Genet*. 2008;40(9):1065-1067.
- 551 14. Takanashi J, Okamoto N, Yamamoto Y, et al. Clinical and radiological features of Japanese patients with a  
552 severe phenotype due to CASK mutations. *Am J Med Genet A*. 2012;158A(12):3112-3118.
- 553 15. Moog U, Bierhals T, Brand K, et al. Phenotypic and molecular insights into CASK-related disorders in males.  
554 *Orphanet J Rare Dis*. 2015;10:44.
- 555 16. Mukherjee K, Patel PA, Rajan DS, LaConte LEW, Srivastava S. Survival of a male patient harboring CASK  
556 Arg27Ter mutation to adolescence. *Mol Genet Genomic Med*. 2020:e1426.
- 557 17. Nishio Y, Kidokoro H, Takeo T, et al. The eldest case of MICPCH with CASK mutation exhibiting gross motor  
558 regression. *Brain Dev*. 2020.
- 559 18. Atasoy D, Schoch S, Ho A, et al. Deletion of CASK in mice is lethal and impairs synaptic function. *P Natl Acad  
560 Sci USA*. 2007;104(7):2525-2530.
- 561 19. Xue L, Cai JY, Ma J, et al. Global expression profiling reveals genetic programs underlying the developmental  
562 divergence between mouse and human embryogenesis. *BMC Genomics*. 2013;14:568.
- 563 20. O'Rahilly R, Muller F. Developmental stages in human embryos: revised and new measurements. *Cells  
564 Tissues Organs*. 2010;192(2):73-84.
- 565 21. Hata Y, Butz S, Sudhof TC. CASK: a novel dlg/PSD95 homolog with an N-terminal calmodulin-dependent  
566 protein kinase domain identified by interaction with neurexins. *J Neurosci*. 1996;16(8):2488-2494.
- 567 22. Stevenson D, Laverty HG, Wenwieser S, Douglas M, Wilson JB. Mapping and expression analysis of the  
568 human CASK gene. *Mamm Genome*. 2000;11(10):934-937.
- 569 23. Ojeh N, Pekovic V, Jahoda C, Maatta A. The MAGUK-family protein CASK is targeted to nuclei of the basal  
570 epidermis and controls keratinocyte proliferation. *J Cell Sci*. 2008;121(Pt 16):2705-2717.
- 571 24. Caruana G. Genetic studies define MAGUK proteins as regulators of epithelial cell polarity. *Int J Dev Biol*.  
572 2002;46(4):511-518.
- 573 25. Marquez-Rosado L, Singh D, Rincon-Arango H, Solan JL, Lampe PD. CASK (LIN2) interacts with Cx43 in  
574 wounded skin and their coexpression affects cell migration. *J Cell Sci*. 2012;125(Pt 3):695-702.
- 575 26. Wang Y, Li R, Du D, et al. Proteomic analysis reveals novel molecules involved in insulin signaling pathway.  
576 *J Proteome Res*. 2006;5(4):846-855.
- 577 27. Zhu ZQ, Wang D, Xiang D, Yuan YX, Wang Y. Calcium/calmodulin-dependent serine protein kinase is involved  
578 in exendin-4-induced insulin secretion in INS-1 cells. *Metabolism*. 2014;63(1):120-126.
- 579 28. Su YY, Liang GP, Liu YS, Chen J, Yang ZC, Luo XD. [Involvement of JNK signal pathway in hypoxia related  
580 upregulation of calcium/calmodulin-dependent serine protein kinase in endothelial cells]. *Zhonghua Shao  
581 Shang Za Zhi*. 2007;23(3):198-200.
- 582 29. Weigand JE, Boeckel JN, Gellert P, Dimmeler S. Hypoxia-induced alternative splicing in endothelial cells.  
583 *PLoS One*. 2012;7(8):e42697.
- 584 30. Beaudreuil S, Zhang X, Herr F, et al. Circulating CASK is associated with recurrent focal segmental  
585 glomerulosclerosis after transplantation. *PLoS One*. 2019;14(7):e0219353.

- 586 31. Ahn SY, Kim Y, Kim ST, Swat W, Miner JH. Scaffolding proteins DLG1 and CASK cooperate to maintain the  
587 nephron progenitor population during kidney development. *J Am Soc Nephrol.* 2013;24(7):1127-1138.
- 588 32. Aravindan RG, Fomin VP, Naik UP, et al. CASK interacts with PMCA4b and JAM-A on the mouse sperm  
589 flagellum to regulate Ca<sup>2+</sup> homeostasis and motility. *J Cell Physiol.* 2012;227(8):3138-3150.
- 590 33. Burkin HR, Zhao L, Miller DJ. CASK is in the mammalian sperm head and is processed during epididymal  
591 maturation. *Mol Reprod Dev.* 2004;68(4):500-506.
- 592 34. Eichel CA, Beuriot A, Chevalier MY, et al. Lateral Membrane-Specific MAGUK CASK Down-Regulates NaV1.5  
593 Channel in Cardiac Myocytes. *Circ Res.* 2016;119(4):544-556.
- 594 35. Beuriot A, Eichel CA, Dilanian G, et al. Distinct calcium/calmodulin-dependent serine protein kinase domains  
595 control cardiac sodium channel membrane expression and focal adhesion anchoring. *Heart Rhythm.*  
596 2020;17(5 Pt A):786-794.
- 597 36. Butz S, Okamoto M, Sudhof TC. A tripartite protein complex with the potential to couple synaptic vesicle  
598 exocytosis to cell adhesion in brain. *Cell.* 1998;94(6):773-782.
- 599 37. Hsueh YP, Yang FC, Kharazia V, et al. Direct interaction of CASK/LIN-2 and syndecan heparan sulfate  
600 proteoglycan and their overlapping distribution in neuronal synapses. *J Cell Biol.* 1998;142(1):139-151.
- 601 38. Jeyifous O, Waites CL, Specht CG, et al. SAP97 and CASK mediate sorting of NMDA receptors through a  
602 previously unknown secretory pathway. *Nat Neurosci.* 2009;12(8):1011-1019.
- 603 39. Lin EI, Jeyifous O, Green WN. CASK regulates SAP97 conformation and its interactions with AMPA and NMDA  
604 receptors. *J Neurosci.* 2013;33(29):12067-12076.
- 605 40. Kuo TY, Hong CJ, Chien HL, Hsueh YP. X-linked mental retardation gene CASK interacts with Bcl11A/CTIP1  
606 and regulates axon branching and outgrowth. *J Neurosci Res.* 2010;88(11):2364-2373.
- 607 41. Gao R, Piguél NH, Melendez-Zaidi AE, et al. CNTNAP2 stabilizes interneuron dendritic arbors through CASK.  
608 *Mol Psychiatry.* 2018;23(9):1832-1850.
- 609 42. Chao HW, Hong CJ, Huang TN, Lin YL, Hsueh YP. SUMOylation of the MAGUK protein CASK regulates  
610 dendritic spinogenesis. *J Cell Biol.* 2008;182(1):141-155.
- 611 43. Samuels BA, Hsueh YP, Shu T, et al. Cdk5 promotes synaptogenesis by regulating the subcellular distribution  
612 of the MAGUK family member CASK. *Neuron.* 2007;56(5):823-837.
- 613 44. Wang TF, Ding CN, Wang GS, et al. Identification of Tbr-1/CASK complex target genes in neurons. *J*  
614 *Neurochem.* 2004;91(6):1483-1492.
- 615 45. Wang GS, Hong CJ, Yen TY, et al. Transcriptional modification by a CASK-interacting nucleosome assembly  
616 protein. *Neuron.* 2004;42(1):113-128.
- 617 46. Hsueh YP, Wang TF, Yang FC, Sheng M. Nuclear translocation and transcription regulation by the  
618 membrane-associated guanylate kinase CASK/LIN-2. *Nature.* 2000;404(6775):298-302.
- 619 47. Bredt DS. Cell biology. Reeling CASK into the nucleus. *Nature.* 2000;404(6775):241-242.
- 620 48. Hirotsune S, Takahara T, Sasaki N, et al. The reeler gene encodes a protein with an EGF-like motif expressed  
621 by pioneer neurons. *Nat Genet.* 1995;10(1):77-83.
- 622 49. Hamburg M. Analysis of the Postnatal Developmental Effects of "Reeler," a Neurological Mutation in Mice.  
623 A Study in Developmental Genetics. *Dev Biol.* 1963;8:165-185.
- 624 50. Hevner RF, Shi L, Justice N, et al. Tbr1 regulates differentiation of the preplate and layer 6. *Neuron.*  
625 2001;29(2):353-366.
- 626 51. Namavar Y, Barth PG, Baas F, Poll-The BT. Reply: Mutations of TSEN and CASK genes are prevalent in  
627 pontocerebellar hypoplasias type 2 and 4. *Brain.* 2012;135(1):e200-e200.
- 628 52. Takanashi J, Arai H, Nabatame S, et al. Neuroradiologic features of CASK mutations. *AJNR Am J Neuroradiol.*  
629 2010;31(9):1619-1622.
- 630 53. van Dijk T, Barth P, Baas F, Reneman L, Poll-The BT. Postnatal Brain Growth Patterns in Pontocerebellar  
631 Hypoplasia. *Neuropediatrics.* 2020.
- 632 54. Srivastava S, McMillan R, Willis J, et al. X-linked intellectual disability gene CASK regulates postnatal brain  
633 growth in a non-cell autonomous manner. *Acta Neuropathol Commun.* 2016;4:30.
- 634 55. Barski JJ, Dethleffsen K, Meyer M. Cre recombinase expression in cerebellar Purkinje cells. *Genesis.*  
635 2000;28(3-4):93-98.
- 636 56. Saul SM, Brzezinski JA, Altschuler RA, et al. Math5 expression and function in the central auditory system.  
637 *Mol Cell Neurosci.* 2008;37(1):153-169.

- 638 57. Zhu Y, Romero MI, Ghosh P, et al. Ablation of NF1 function in neurons induces abnormal development of  
639 cerebral cortex and reactive gliosis in the brain. *Genes Dev.* 2001;15(7):859-876.
- 640 58. Kerr A, Patel PA, LaConte LEW, et al. Non-Cell Autonomous Roles for CASK in Optic Nerve Hypoplasia. *Invest*  
641 *Ophthalmol Vis Sci.* 2019;60(10):3584-3594.
- 642 59. Schiffmann SN, Cheron G, Lohof A, et al. Impaired motor coordination and Purkinje cell excitability in mice  
643 lacking calretinin. *Proc Natl Acad Sci U S A.* 1999;96(9):5257-5262.
- 644 60. Bearzatto B, Servais L, Roussel C, et al. Targeted calretinin expression in granule cells of calretinin-null mice  
645 restores normal cerebellar functions. *FASEB J.* 2006;20(2):380-382.
- 646 61. Porter AP, White GRM, Mack NA, Malliri A. The interaction between CASK and the tumour suppressor Dlg1  
647 regulates mitotic spindle orientation in mammalian epithelia. *J Cell Sci.* 2019;132(14).
- 648 62. LaConte LE, Chavan V, Liang C, et al. CASK stabilizes neurexin and links it to liprin-alpha in a neuronal activity-  
649 dependent manner. *Cell Mol Life Sci.* 2016;73(18):3599-3621.
- 650 63. Tabuchi K, Biederer T, Butz S, Sudhof TC. CASK participates in alternative tripartite complexes in which Mint  
651 1 competes for binding with caskin 1, a novel CASK-binding protein. *J Neurosci.* 2002;22(11):4264-4273.
- 652 64. Cortese GP, Zhu M, Williams D, Heath S, Waites CL. Parkin Deficiency Reduces Hippocampal Glutamatergic  
653 Neurotransmission by Impairing AMPA Receptor Endocytosis. *J Neurosci.* 2016;36(48):12243-12258.
- 654 65. Mukherjee K, Sharma M, Jahn R, Wahl MC, Sudhof TC. Evolution of CASK into a Mg<sup>2+</sup>-Sensitive Kinase. *Sci*  
655 *Signal.* 2010;3(119).
- 656 66. Mukherjee K, Sharma M, Urlaub H, et al. CASK functions as a Mg<sup>2+</sup>-independent neurexin kinase. *Cell.*  
657 2008;133(2):328-339.
- 658 67. Mori T, Kasem EA, Suzuki-Kouyama E, et al. Deficiency of calcium/calmodulin-dependent serine protein  
659 kinase disrupts the excitatory-inhibitory balance of synapses by down-regulating GluN2B. *Mol Psychiatry.*  
660 2019;24(7):1079-1092.
- 661 68. Huang TN, Hsueh YP. Calcium/calmodulin-dependent serine protein kinase (CASK), a protein implicated in  
662 mental retardation and autism-spectrum disorders, interacts with T-Brain-1 (TBR1) to control extinction of  
663 associative memory in male mice. *J Psychiatry Neurosci.* 2017;42(1):37-47.
- 664 69. Strand AD, Aragaki AK, Shaw D, et al. Gene expression in Huntington's disease skeletal muscle: a potential  
665 biomarker. *Hum Mol Genet.* 2005;14(13):1863-1876.
- 666 70. Arefin AS, Mathieson L, Johnstone D, Berretta R, Moscato P. Unveiling clusters of RNA transcript pairs  
667 associated with markers of Alzheimer's disease progression. *PLoS One.* 2012;7(9):e45535.
- 668 71. Morello G, Guarnaccia M, Spampinato AG, et al. Integrative multi-omic analysis identifies new drivers and  
669 pathways in molecularly distinct subtypes of ALS. *Sci Rep.* 2019;9(1):9968.
- 670 72. George G, Singh S, Lokappa SB, Varkey J. Gene co-expression network analysis for identifying genetic  
671 markers in Parkinson's disease - a three-way comparative approach. *Genomics.* 2018.
- 672 73. Kasher PR, Namavar Y, van Tijn P, et al. Impairment of the tRNA-splicing endonuclease subunit 54 (tsen54)  
673 gene causes neurological abnormalities and larval death in zebrafish models of pontocerebellar hypoplasia.  
674 *Hum Mol Genet.* 2011;20(8):1574-1584.
- 675 74. van Dijk T, Baas F, Barth PG, Poll-The BT. What's new in pontocerebellar hypoplasia? An update on genes  
676 and subtypes. *Orphanet J Rare Dis.* 2018;13(1):92.
- 677 75. Patel PA, Liang C, Arora A, et al. Haploinsufficiency of X-linked intellectual disability gene CASK induces post-  
678 transcriptional changes in synaptic and cellular metabolic pathways. *Exp Neurol.* 2020;329:113319.
- 679 76. Hagberg B, Aicardi J, Dias K, Ramos O. A progressive syndrome of autism, dementia, ataxia, and loss of  
680 purposeful hand use in girls: Rett's syndrome: report of 35 cases. *Ann Neurol.* 1983;14(4):471-479.
- 681 77. Fehr S, Wilson M, Downs J, et al. The CDKL5 disorder is an independent clinical entity associated with early-  
682 onset encephalopathy. *Eur J Hum Genet.* 2013;21(3):266-273.
- 683 78. Guy J, Hendrich B, Holmes M, Martin JE, Bird A. A mouse Mecp2-null mutation causes neurological  
684 symptoms that mimic Rett syndrome. *Nat Genet.* 2001;27(3):322-326.
- 685 79. Pryce JW, Bamber AR, Ashworth MT, Kiho L, Malone M, Sebire NJ. Reference ranges for organ weights of  
686 infants at autopsy: results of >1,000 consecutive cases from a single centre. *BMC Clin Pathol.* 2014;14:18.
- 687 80. Wang Y, Wang C, Ranefall P, et al. SynQuant: an automatic tool to quantify synapses from microscopy  
688 images. *Bioinformatics.* 2020;36(5):1599-1606.

690

691

692

693

694

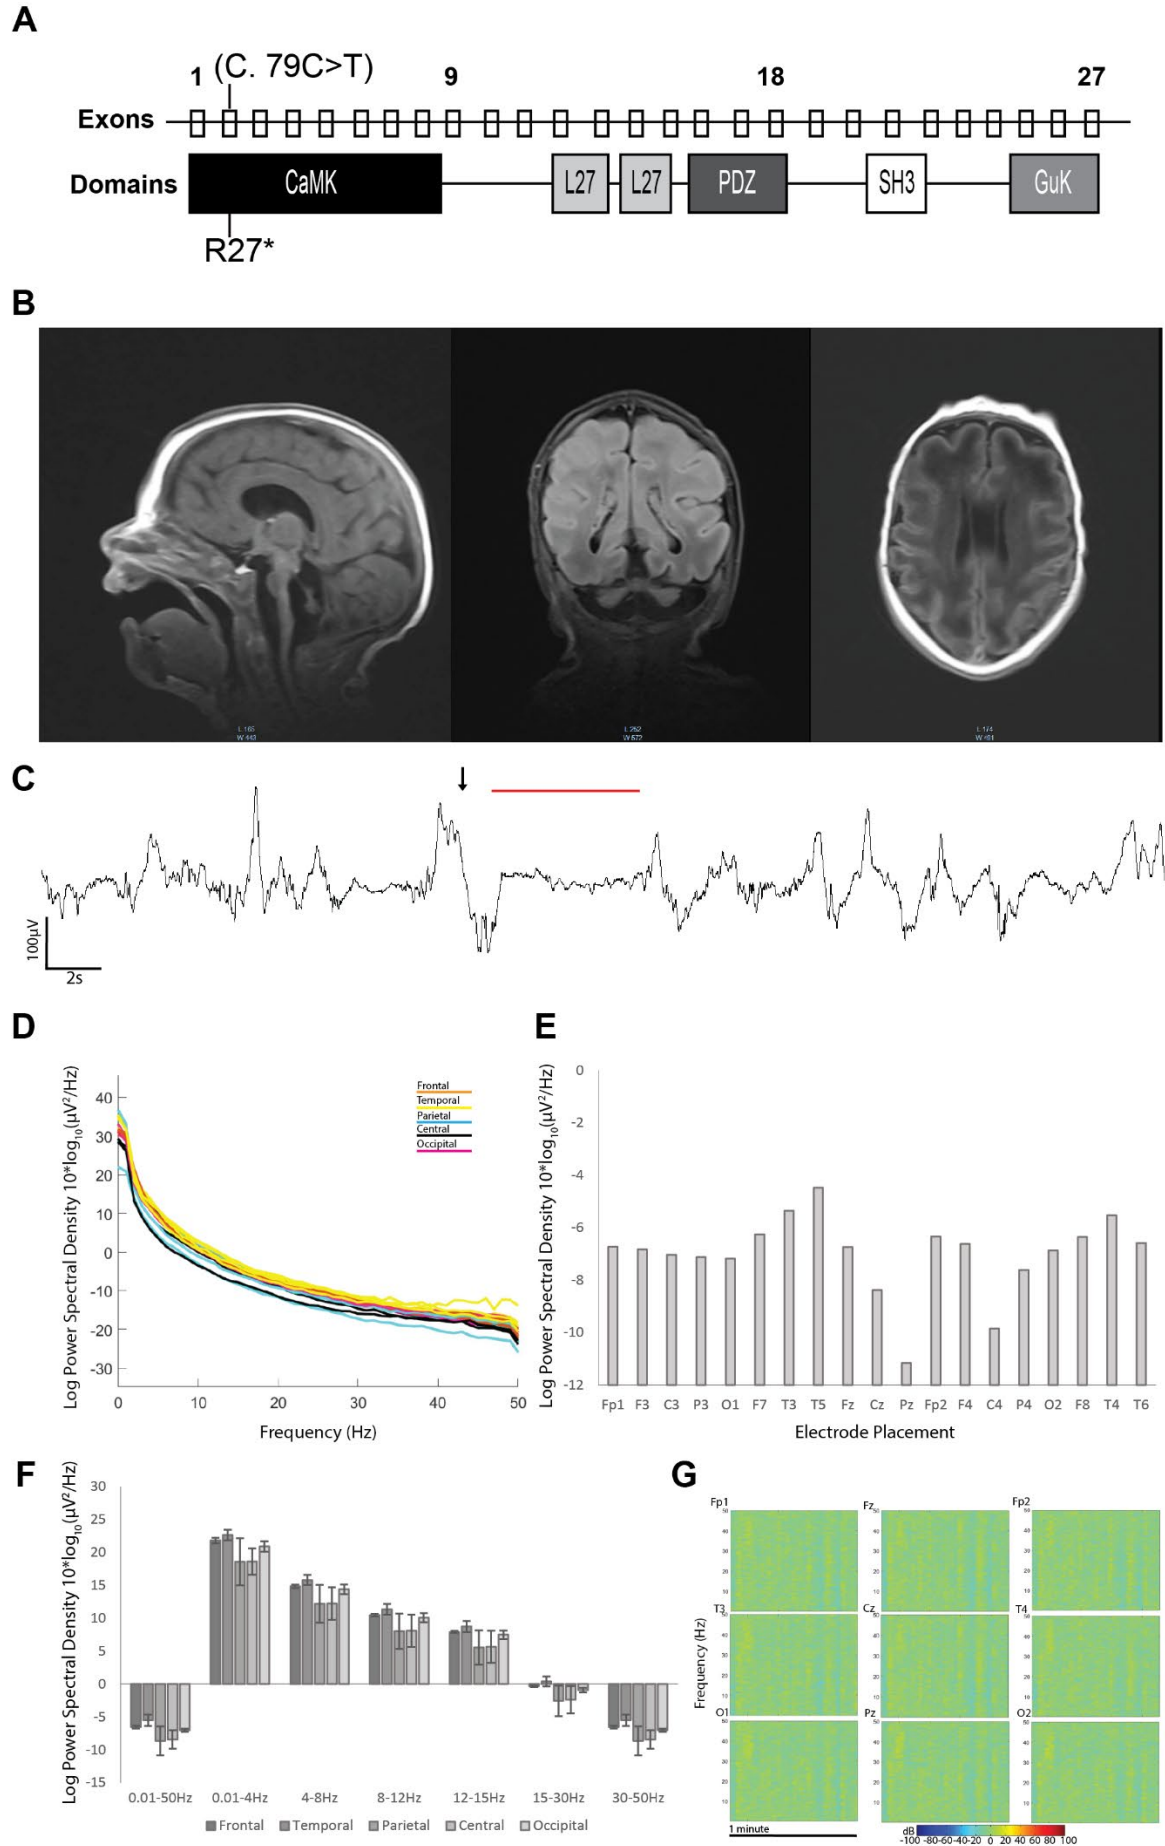

696 **Figure 1. The R27Ter mutation results in early truncation of *CASK*, pontocerebellar**  
697 **hypoplasia and slowed EEG in a human subject.** A) Location of the R27Ter mutation in the  
698 male decedent; top row: exons of the human *CASK* gene; bottom row: corresponding *CASK*  
699 protein domains. B) Brain MRI scan obtained at 2 weeks revealed severely diminished cerebellar  
700 and pontine size with otherwise normal formation of cortical gyri; sagittal, coronal, and transverse  
701 planes can be seen from left to right, respectively. C) A representative example of discontinuous  
702 EEG pattern (arrow and red line in the EEG trace); more examples of burst suppression can be  
703 found in Supplemental Figure 2. D) Power spectral density curves in the 0.01-50Hz range for  
704 each electrode independently; colors correspond to underlying cortical location of a given  
705 electrode. E) Quantification of mean power spectral density for each electrode in the entire 0.01-  
706 50Hz range. F) Mean power spectral density divided into biologically relevant frequency bands of  
707 delta, theta, alpha, beta, and low gamma divided by lobe; error bars represent standard deviation  
708 between electrodes within a given lobe. G) Representative time frequency plots of 1 minute of the  
709 recording by electrode position.

710

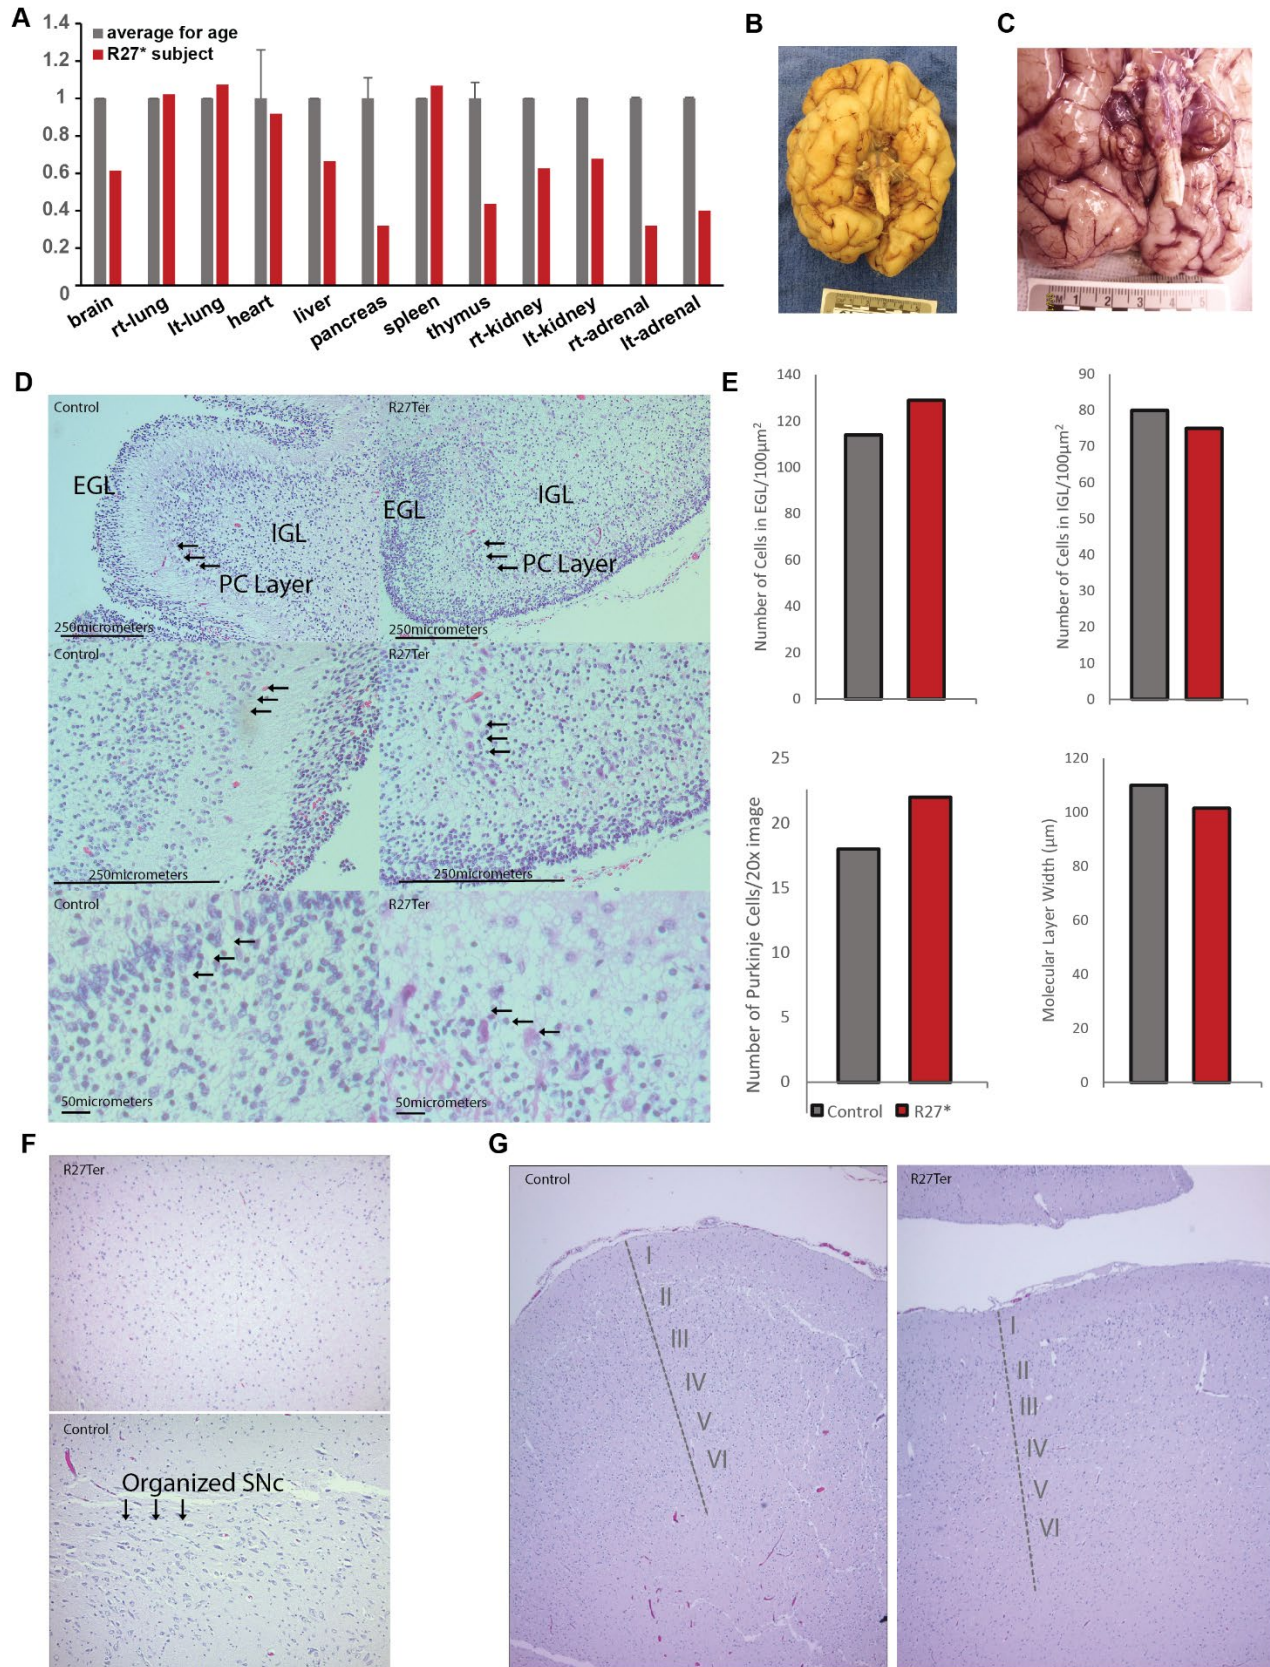

712 **Figure 2. Absence of CASK leads to smaller organs including brain with normal histology of**  
713 **cerebellum and no defect in lamination or cellular migration.** A) Organ weight of the decedent  
714 relative to average weight for the age <sup>79</sup>. B) Gross image of the underside of the brain of the  
715 decedent showing normal cortical gyri development with a severely diminished cerebellar volume.  
716 C) Close-up of image in (B). D) H&E staining of cerebellar cortex of the R27Ter subject and of a  
717 46-day-old infant female (died of unrelated cause), indicating proper lamination of cerebellar  
718 cortex with external granular layer (EGL), internal granular layer (IGL), and Purkinje cell layers;  
719 arrows indicate properly aligned Purkinje cells. E) Quantification of granule cells in the internal  
720 and external granular layers, Purkinje cells, and width of the molecular layer between the R27Ter  
721 subject and a 20-day-younger female who died of an unrelated cause. F) H&E-stained substantia  
722 nigra of the decedent and control showing lack of an organized substantia nigra in the absence of  
723 CASK. Arrows in the control brain indicate neuronal cells in the substantia nigra (purple color).  
724 G) H&E-stained cortex of R27Ter subject and control demonstrating proper cortical lamination in  
725 the presence and absence of CASK.

726

727

728

729



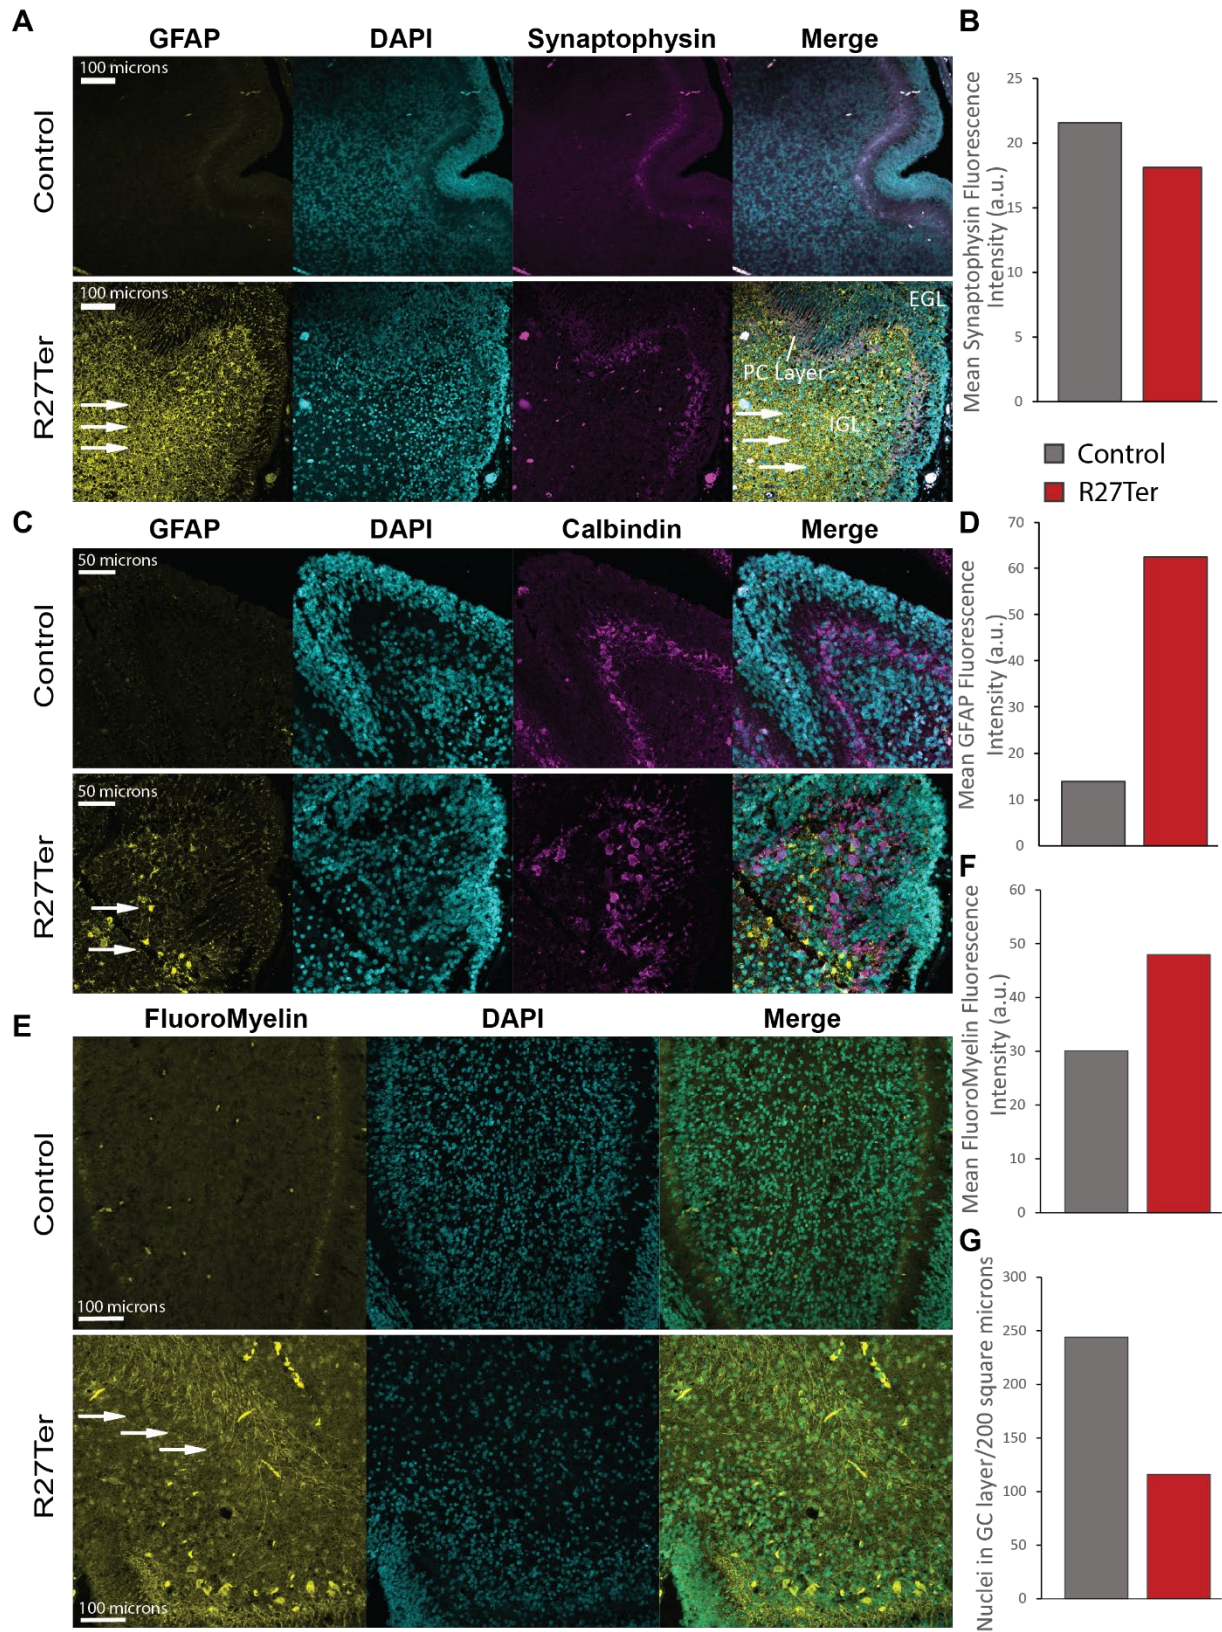

731 **Figure 3. The R27Ter mutation is associated with pronounced astrogliosis in cerebellum, and**  
732 **defects in white matter .** (A) Representative images of GFAP and synaptophysin immunostaining  
733 in the R27Ter and age-matched control human cerebellum; from left to right: GFAP, DAPI,  
734 synaptophysin, merge. Arrows indicate increased GFAP immunoreactivity. (B) Quantification of  
735 synaptophysin counterstain, demonstrating similar staining intensity in control and R27Ter  
736 subject. (C) Representative images of GFAP and calbindin immunostaining in the R27Ter and  
737 age-matched control human cerebellum; from left to right: GFAP, DAPI, calbindin, merge. Arrows  
738 indicate increased GFAP immunoreactivity. (D) Quantification of GFAP immunostaining  
739 fluorescence intensity between R27Ter cerebellum and control cerebellum. (E) Fluorescent  
740 labelling of myelin using FluoroMyelin indicating frayed white matter with individually visible  
741 axons in the R27Ter subject compared to the diffuse staining observed in the age-matched control;  
742 from left to right: FluoroMyelin staining, DAPI, merge. (F) Quantification of FluoroMyelin  
743 fluorescence intensity. (G) Quantification of DAPI+ nuclei in the granular layer indicating a  
744 decreased number of cells.

745

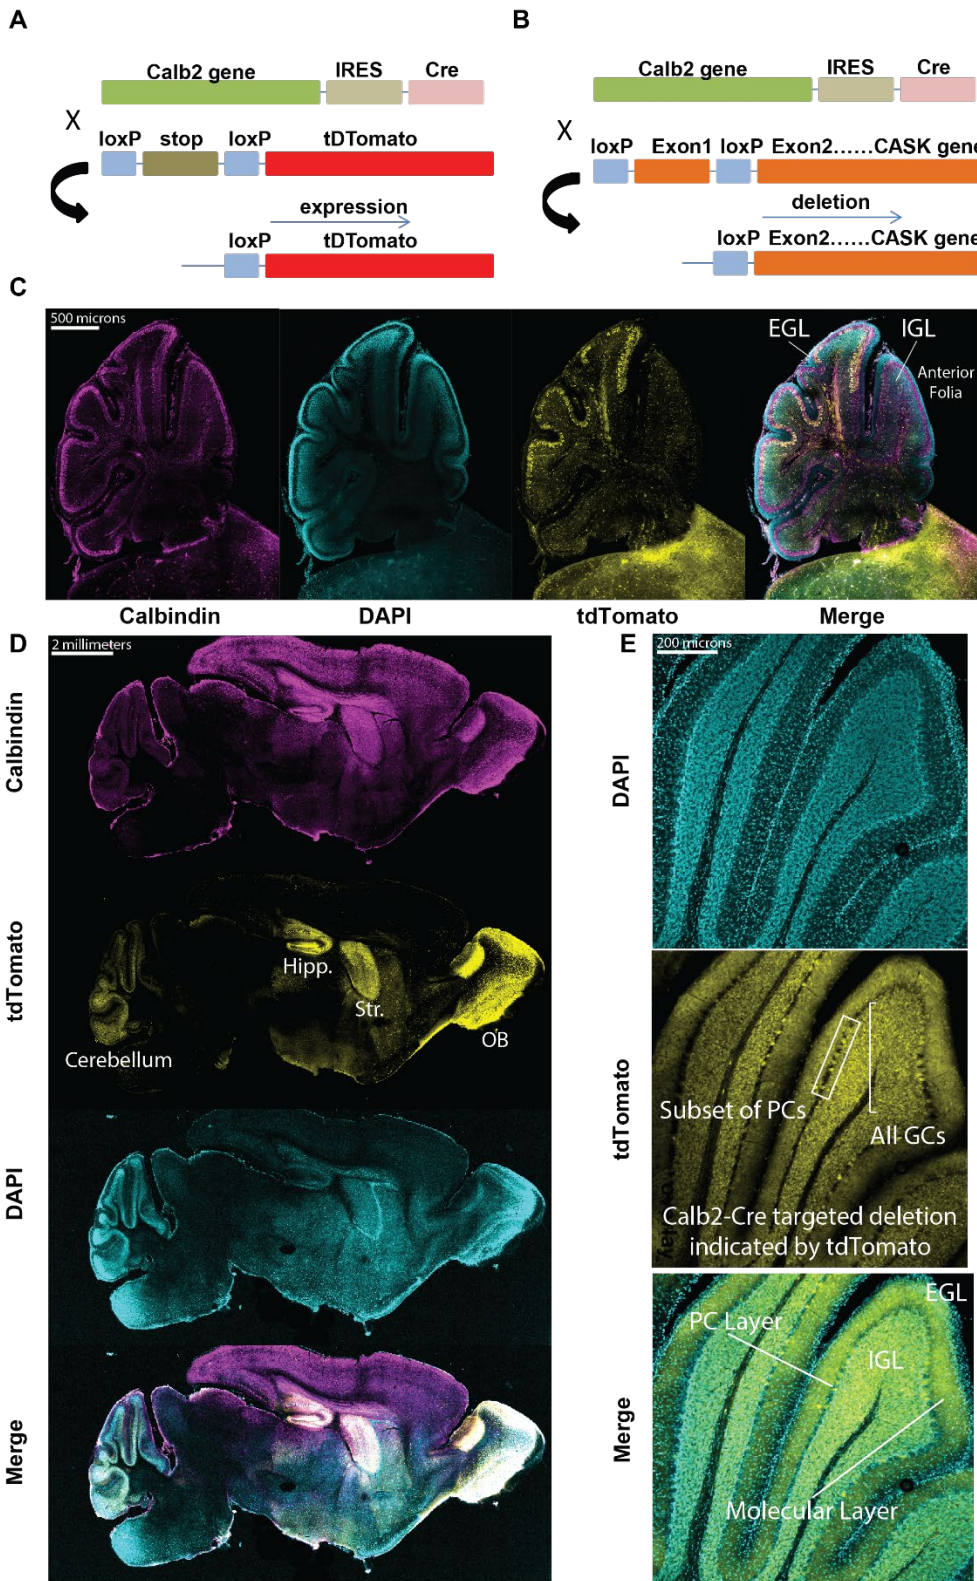

747 **Figure 4. *Calb2*-Cre expresses only in post-migratory cerebellar granule cells and a subset of**  
748 **Purkinje cells in the anterior folia.** (A) Generation of LoxP-STOP-LoxP tdTomato reporter mice  
749 for determination of cell-type and age-specific Cre-mediated recombination; tdTomato expression  
750 serves as a proxy for *CASK* deletion in subsequent panels. (B) Schematic of breeding strategy  
751 used to selectively delete *Cask* from cerebellar cells. (C) Sagittal section of cerebellum at P8,  
752 demonstrating recombination in a subset of Purkinje cells and cells in the internal granular layer,  
753 but not in granule cells of the external granular layer; from left to right: tdTomato, DAPI, merge.  
754 (D) 20x images of a sagittal section of whole mouse brain at P15, demonstrating recombination in  
755 several brain regions, notably the cerebellum, olfactory bulb (OB), hippocampus (Hipp.), and  
756 striatum (Str.) after development; from top to bottom: calbindin, tdTomato, DAPI, merge. (E)  
757 Higher magnification images of cerebellar folia at P15, demonstrating recombination in virtually  
758 all cells in the granular layer but only in a small subset of Purkinje cells; box indicates a sample of  
759 the subpopulation of Purkinje cells expressing tdTomato reporter while the bracket indicates all  
760 granule cells observed expressing tdTomato. The Purkinje cell (PC) layer, molecular layer, IGL,  
761 and EGL are indicated for one folium for anatomical orientation.

762

763

764

765

766

767

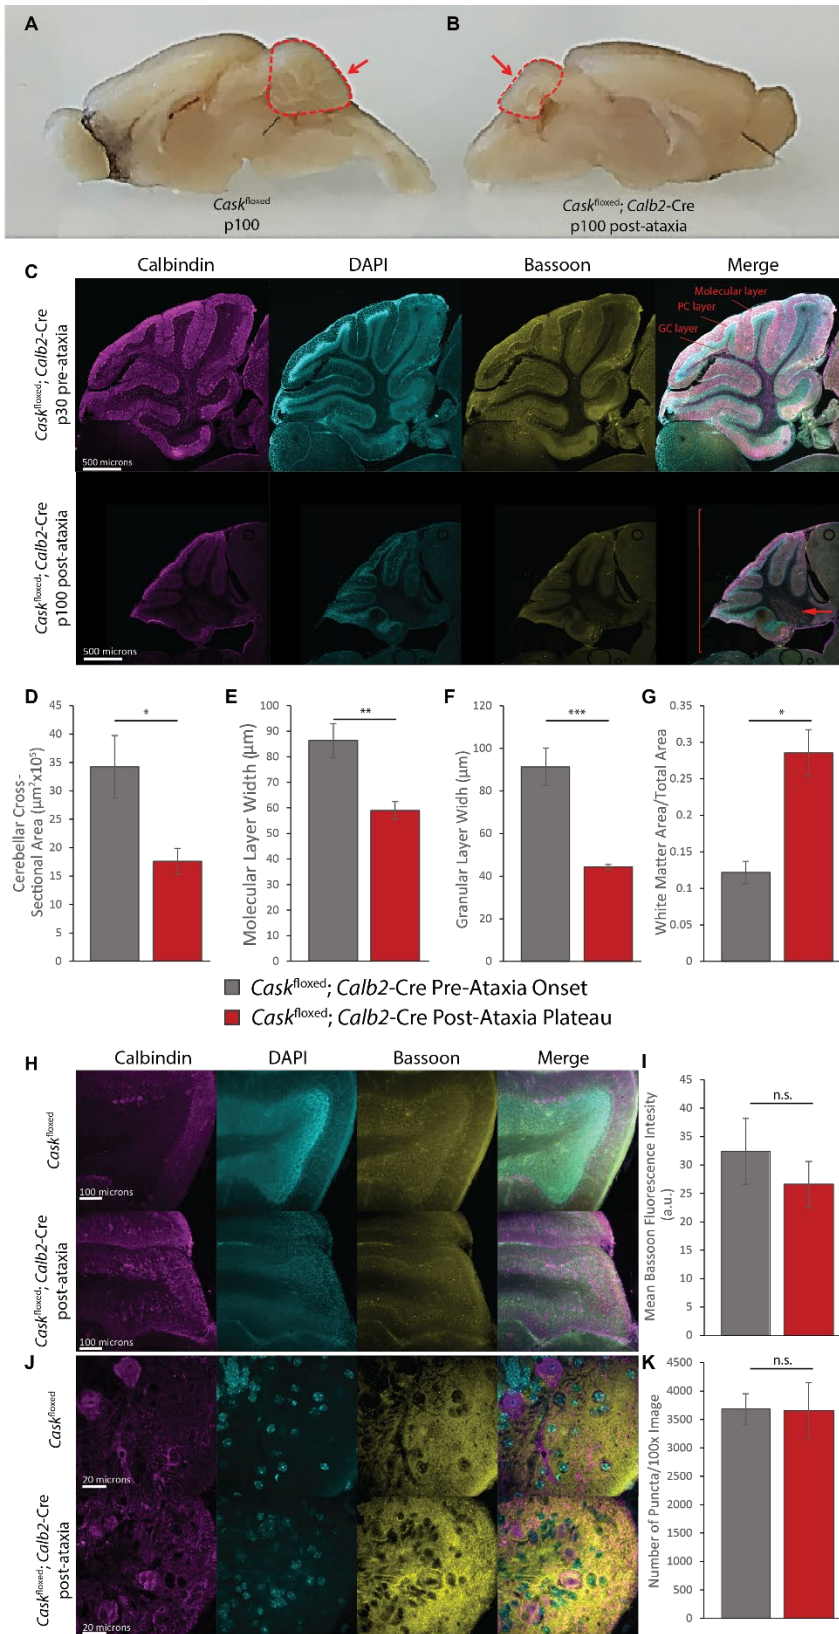

769 **Figure 5. Deletion of *Cask* from post-migratory cerebellar cells results in profound cerebellar**  
770 **degeneration and accompanying ataxia.** (A) Gross images of age-matched *Cask*<sup>flxed</sup> control and  
771 (B) *Cask*<sup>flxed</sup>;*Calb2*-Cre brains after plateau of ataxia; arrow indicates diminished volume of the  
772 cerebellum while the remainder of the brain remains similarly sized. (C) 10x image of  
773 *Cask*<sup>flxed</sup>;*Calb2*-Cre at P30 (top) and P100 (bottom) demonstrating severely reduced cross-  
774 sectional area, molecular layer width and granular layer width at P100; the arrow indicates  
775 expanded white matter; the bracket indicates diminished overall cerebellar size. (D-F)  
776 Quantification of the entire cross-sectional area pre- and post-ataxia, molecular layer width, and  
777 granular layer width. (G) Ratio of white matter area to total cross-sectional area pre- and post-  
778 ataxia. n=3 for (B-G). (H) Representative 20x images of the anterior cerebellar folia in  
779 *Cask*<sup>flxed</sup>;*Calb2*-Cre post-ataxia plateau (bottom) and age-matched *Cask*<sup>flxed</sup> controls (top)  
780 immunostained for calbindin to label Purkinje cells, DAPI to label nuclei, and bassoon to label  
781 synapses. (I) Quantification of bassoon staining intensity indicates no difference in fluorescence  
782 intensity between groups. (J) Representative 100x images of *Cask*<sup>flxed</sup>;*Calb2*-Cre post-ataxia  
783 plateau (bottom) and age-matched *Cask*<sup>flxed</sup> controls (top). (K) Quantification of the number of  
784 bassoon positive puncta per 100x image quantified automatically using SynQuant<sup>80</sup> indicating no  
785 difference between groups. N=3 *Cask*<sup>flxed</sup> and 4 *Cask*<sup>flxed</sup>;*Calb2*-Cre for (H-K); bars in all panels  
786 indicate mean±SEM. \* indicates p < 0.05 using a two-tailed Student's t-test.

787

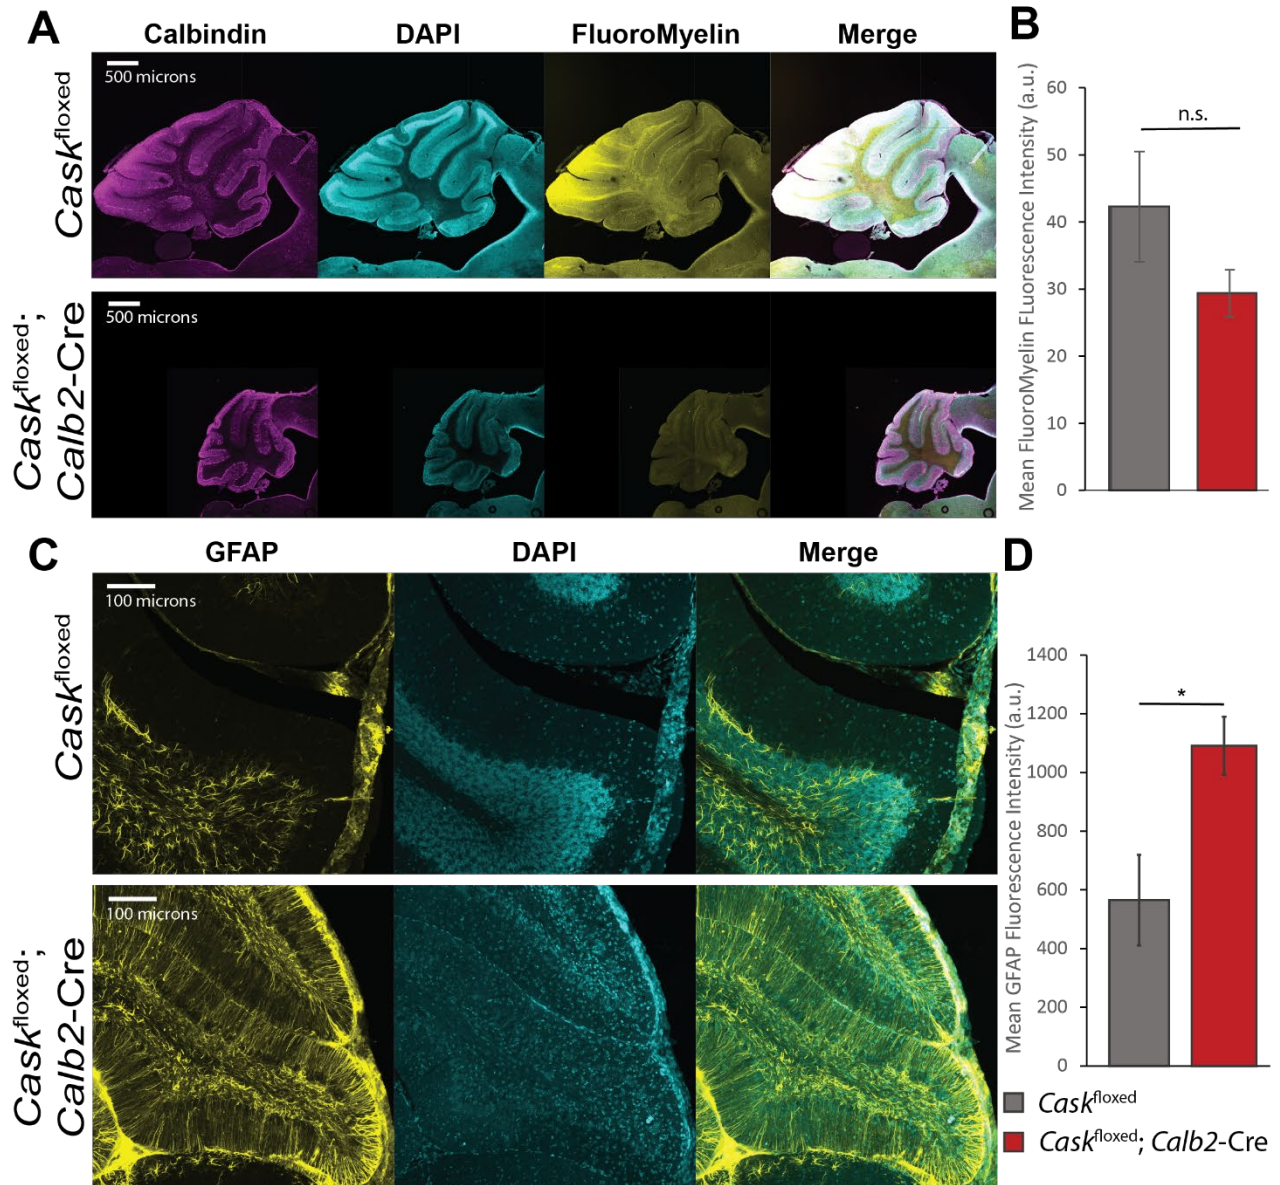

788

789 **Figure 6. *Cask*<sup>flxed</sup>; *Calb2-Cre* mice display disorganized white matter and astrogliosis in**

790 **cerebellum.** (A) Cerebella of adult *Cask*<sup>flxed</sup>; *Calb2-Cre* post-ataxia plateau and *Cask*<sup>flxed</sup> controls

791 were labeled for calbindin, DAPI and FluoroMyelin (white matter). The mice display disorganized

792 white matter with loss of myelinated fibers in the anterior folia. (B) Quantification of pixel

793 intensity of FluoroMyelin performed with n=4 mice of each genotype. (C) Representative images

794 of GFAP immunostaining of anterior cerebellar folia in *Cask*<sup>flxed</sup>; *Calb2-Cre* post-ataxia plateau

795 and age-matched *Cask*<sup>flxed</sup> controls; from left to right: GFAP, DAPI, merge. (D) Quantification of

796 fluorescence intensity of GFAP staining by genotype; asterisk indicates  $p < 0.05$ ,  $n = 3$  mice of each  
797 genotype.

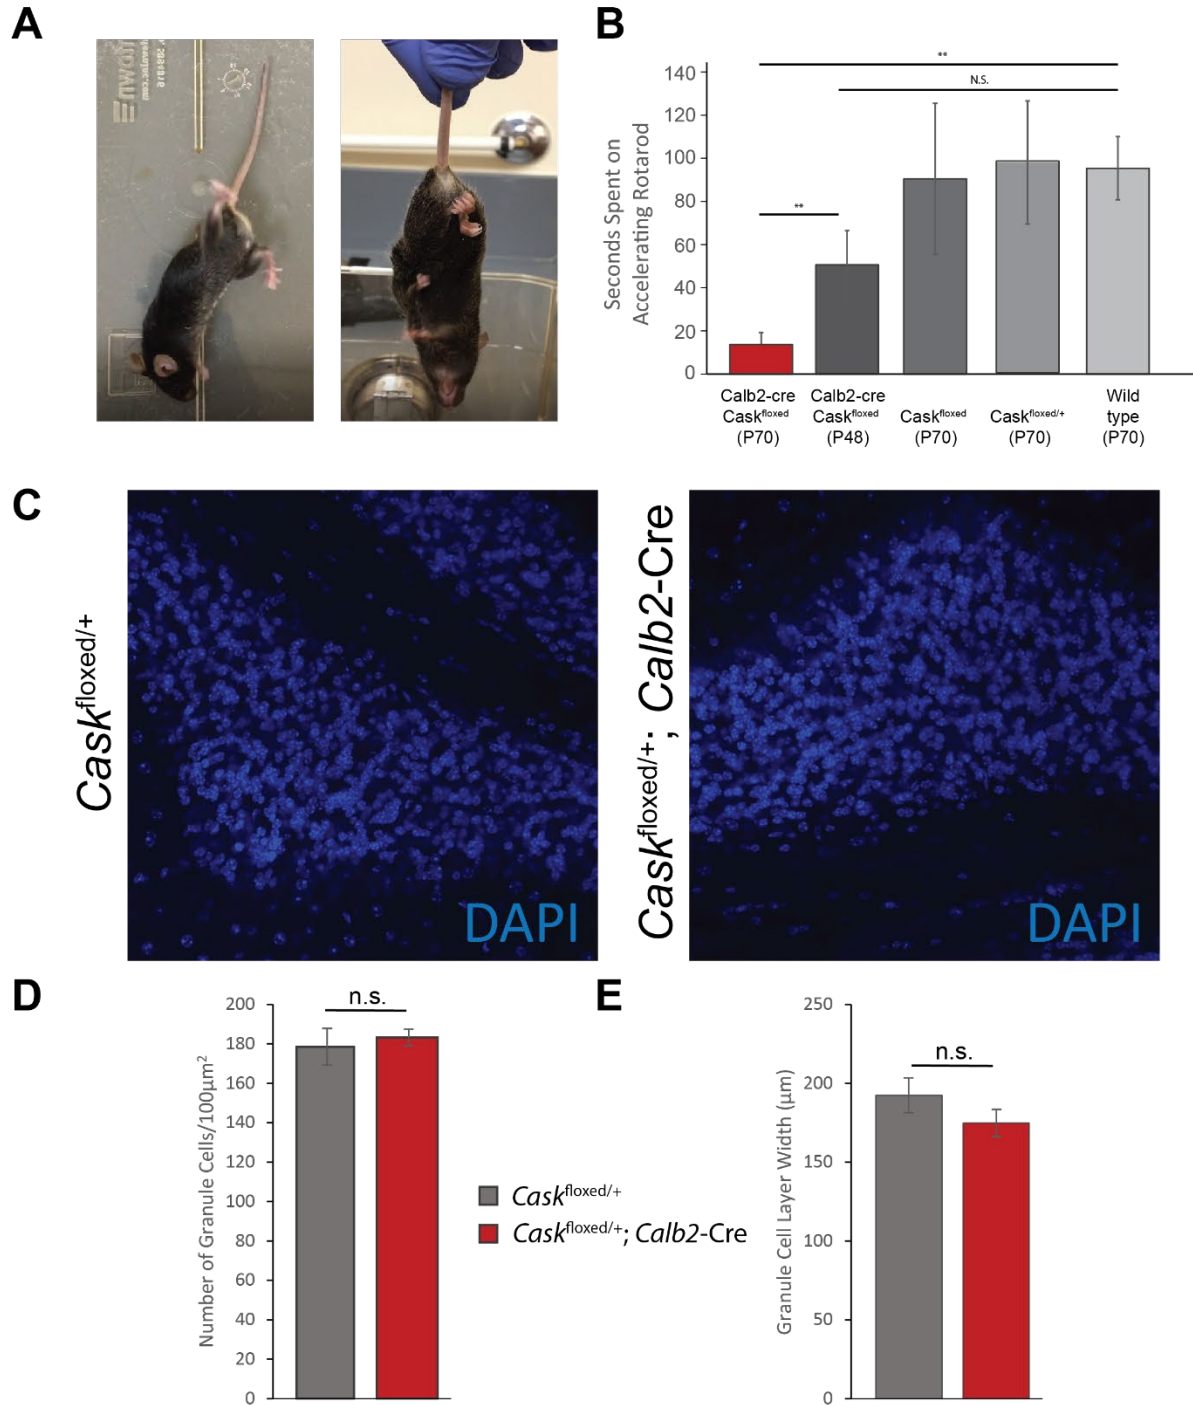



799 **Figure 7. Cerebellar degeneration is accompanied by locomotor incoordination but does not**  
800 **occur in the heterozygous condition.** (A) Example of aberrant locomotor behavior observed in a  
801 *Cask*<sup>flox</sup>; *Calb2*-Cre mouse after plateau of ataxia. Example of hindlimb-clasping behavior in a  
802 *Cask*<sup>flox</sup>; *Calb2*-Cre mouse. (B) Time spent on an accelerating rotarod in seconds by genotype  
803 from left to right: *Cask*<sup>flox</sup>; *Calb2*-Cre post-ataxia onset (n=4); *Cask*<sup>flox</sup>; *Calb2*-Cre pre-ataxia  
804 onset (n=5); age-matched *Cask*<sup>flox</sup> controls (n=4); age-matched heterozygous *Cask*<sup>flox/+</sup> controls  
805 (n=3); and age-matched wild-type controls (n=4). \* indicates  $p < 0.05$  using a two-tailed Student's  
806 t-test. Results are plotted as mean $\pm$ SEM for all panels. (C) Fluorescent images of nuclei in the  
807 granule cell layer for *Cask*<sup>flox/+</sup> control mice (left) and *Cask*<sup>flox/+</sup>; *Calb2*-Cre heterozygous  
808 cerebellar knockout mice (right) aged over 1 year. (D-E) Quantification of DAPI+ nuclei density  
809 (D) and granular layer width (E) demonstrating no degenerative cell death or thinning of the  
810 granular layer compared to control in the heterozygous knockout; n=4 mice in each genotype.

811

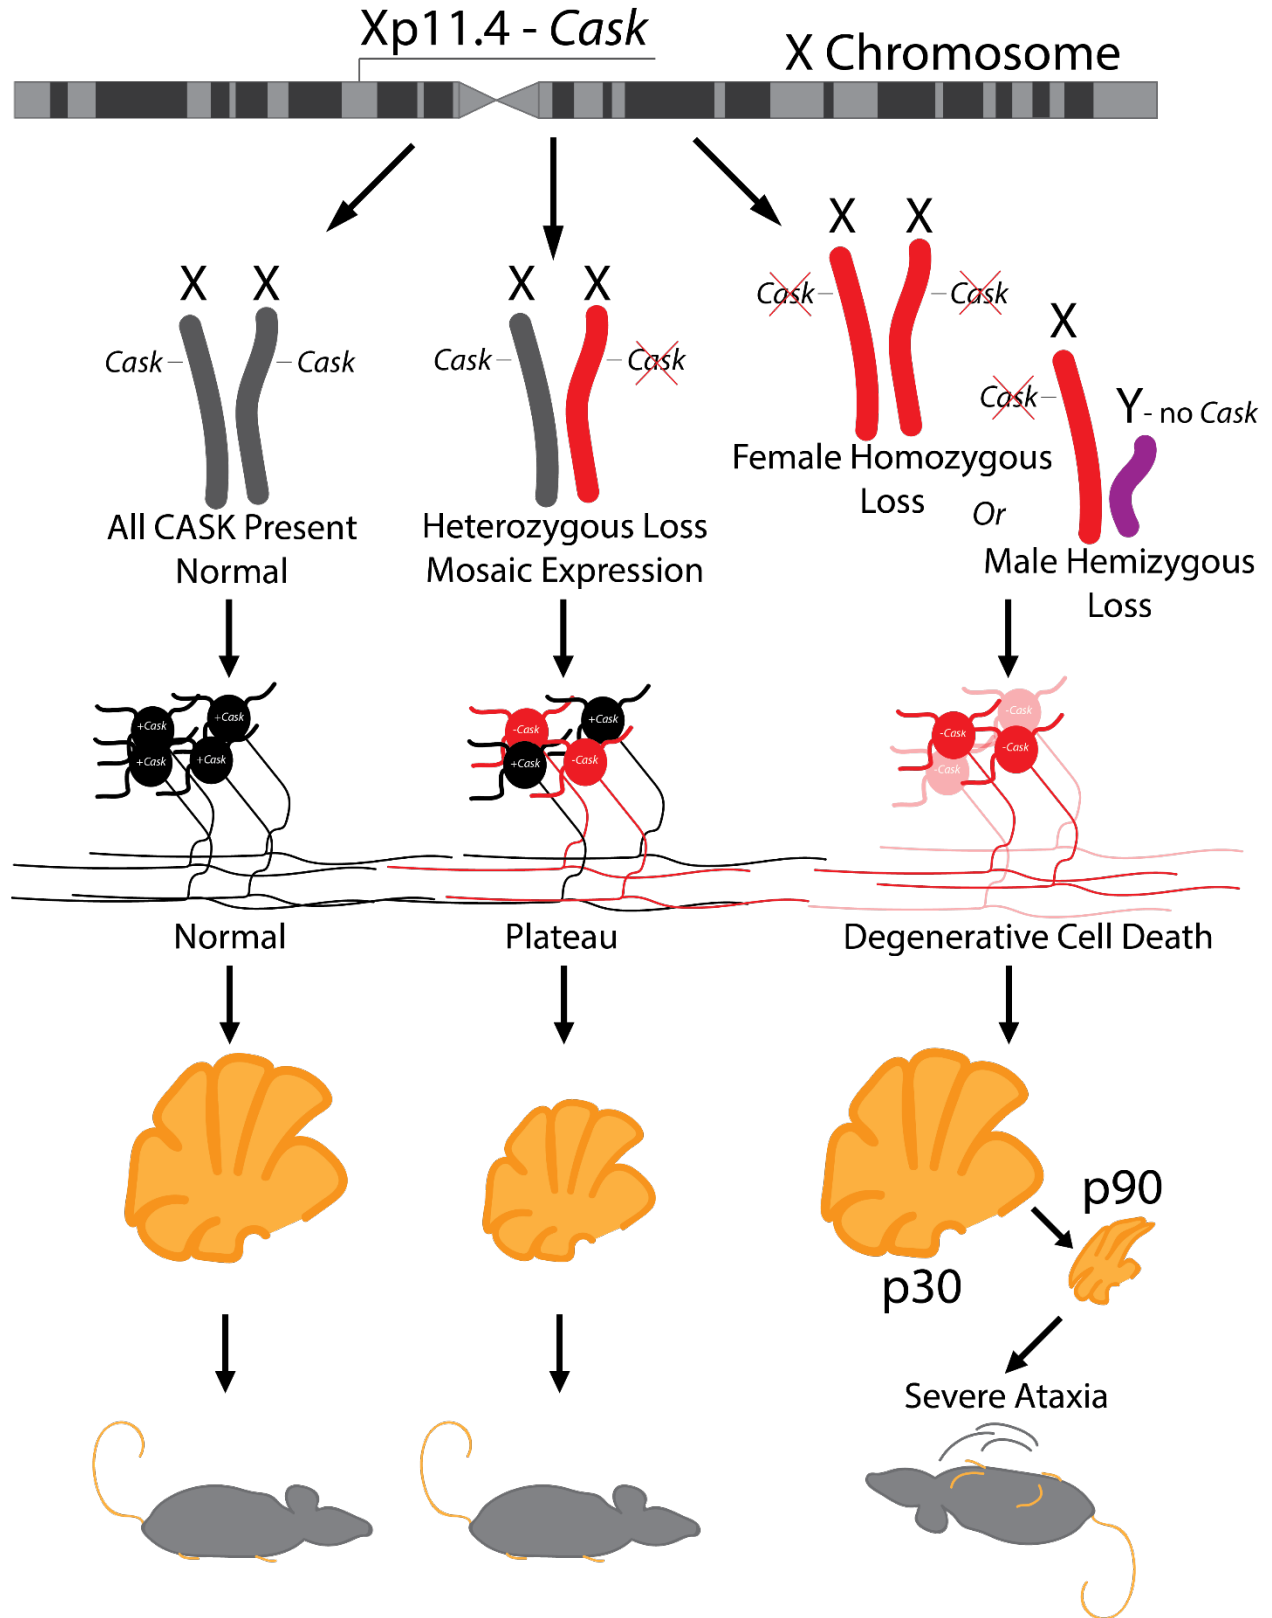

813 **Figure 8. Model describing zygoty-based mechanism of a neurodevelopmental versus**  
814 **neurodegenerative clinical course of CASK-linked phenotype based on random X-**  
815 **chromosome inactivation.** CASK is an X-linked gene critical for maintenance of cerebellar  
816 neurons. Heterozygous mutation in CASK produces CASK loss-of-function in only 50% of  
817 neurons (red). In the heterozygous condition (red and gray), neurodegeneration thus plateaus  
818 (bottom middle), causing an apparent neurodevelopmental disorder, whereas hemizygous CASK  
819 mutations (red and purple) in male mice or homozygous CASK mutation (two reds) in female mice  
820 produce a progressive phenotype typical of neurodegeneration with severe ataxia (bottom right).  
821
